# Supplementary material
Source: PubMed Central journal article supplement (PMC4407866)
Supplement: supp_db14-1504_DB141504SupplementaryData.pdf [file supp_db14-1504_DB141504SupplementaryData.pdf]

## SUPPLEMENTARY DATA

### **Sixty-five common genetic variants and prediction of type 2 diabetes**

Talmud et al

#### **UCLEB consortium study members**

**Northwick Park Heart Study II (NPHS II):** Philippa J Talmud<sup>1</sup>, Steve E Humphries<sup>1</sup>, Jackie A Cooper<sup>1</sup>

**British Regional Heart Study (BRHS)** Richard Morris<sup>2</sup>, Peter Whincup<sup>3</sup>, Goya Wannamethee<sup>2</sup>, Barbara Jefferis<sup>2</sup>

**British Women's Health and Heart Study:** Caroline Dale<sup>4</sup>, Antoinette Amuzu<sup>4</sup>, Tom Gaunt<sup>5,6</sup>, Teri-Louise Davies<sup>5,6</sup>, Debbie A Lawlor<sup>5,6</sup>, Ian N Day<sup>5,6</sup>

**Medical Research Council National Survey of Health and Development (MRC NSHD):** Andrew Wong<sup>7</sup>, Ken Ong<sup>7,8</sup>, Marcus Richards<sup>7</sup>, Rebecca Hardy<sup>7</sup>, Diana Kuh<sup>7</sup>

**Whitehall II Study (WHII):** Mika Kivimaki<sup>9</sup>, Meena Kumari<sup>9</sup>, Claudia Langenberg<sup>8,9</sup>

**English Longitudinal Study of Ageing (ELSA):** Meena Kumari<sup>9</sup>

**1958 Birth cohort (1958BC)** Christine Power<sup>10</sup>, Elina Hypponen<sup>10,11,12</sup>

**Caerphilly prospective study (CaPS):** Yoav Ben-Shlomo<sup>5</sup>, Ian N Day<sup>5,6</sup>

**Edinburgh Artery Study (EAS); Edinburgh Type 2 Diabetes Study (ET2DS); Asymptomatic**

**Atherosclerosis Aspirin Trial (AAAT); Edinburgh Heart Disease Prevention Study (EHDPS) :** Stela McLachlan<sup>13</sup>, Mark WJ Strachan<sup>14</sup>, Jacqueline Price<sup>13</sup>

Tina Shah<sup>9</sup>, Jorgen Engmann<sup>9</sup>, Jon White<sup>15</sup>, Claudia Giambartolomei<sup>15</sup>, Delilah Zabaneh<sup>15</sup>, Michael V Holmes<sup>9,16</sup>, Daniel I Swerdlow<sup>9</sup>, Reecha Sofat<sup>17</sup>, Mark Caulfield<sup>18</sup>, Shah Ebrahim<sup>4</sup>, Nicholas Wareham<sup>8</sup>, Vincent Plagnol<sup>15</sup>, Frank Dudbridge<sup>4</sup>, John C Whittaker<sup>19</sup>, Juan P Casas<sup>4,9</sup>, Aroon D Hingorani<sup>9,17</sup>

<sup>1</sup> Centre for Cardiovascular Genetics, Dept. of Medicine, British Heart Foundation Laboratories, Rayne Building, Royal Free and University College Medical School, London, UK

<sup>2</sup> Department of Non-Communicable Disease Epidemiology, London School of Hygiene and Tropical Medicine, London, UK

<sup>3</sup> University College London Genetics Institute, Department of Genetics, Environment and Evolution, London<sup>4</sup>Department of Non-Communicable Disease Epidemiology, London School of Hygiene and Tropical Medicine, London, UK

<sup>5</sup> School of Social and Community Medicine, University of Bristol, Bristol, UK

<sup>6</sup> MRC Integrative Epidemiology Unit at the University of Bristol, UK

<sup>7</sup> MRC Unit for Lifelong Health and Ageing, London, UK

<sup>8</sup> MRC Epidemiology Unit, Institute of Metabolic Science, Addenbrooke's Hospital, Cambridge, UK

<sup>9</sup> Department of Epidemiology & Public Health, UCL Institute of Epidemiology & Health Care, University College London, London, UK

## SUPPLEMENTARY DATA

<sup>10</sup> Centre for Paediatric Epidemiology and Biostatistics, University College London Institute of Child Health, London

<sup>11</sup> School of Population Health and Sansom Institute, University of South Australia, Adelaide, Australia

<sup>12</sup> South Australian Health and Medical Research Institute, Adelaide, Australia

<sup>13</sup> Centre for Population Health Sciences, University of Edinburgh, Edinburgh, UK

<sup>14</sup> Metabolic Unit, Western General Hospital, Edinburgh, UK

<sup>15</sup> University College London Genetics Institute, Department of Genetics, Environment and Evolution, London, UK

<sup>16</sup> Division of Transplant Surgery, Perelman School of Medicine, University of Pennsylvania, Philadelphia, PA

<sup>17</sup> Centre for Clinical Pharmacology, University College London, London, UK

<sup>18</sup> William Harvey Research Institute, Barts and the London. Queen Mary's School of Medicine and Dentistry, London, UK

<sup>19</sup> Genetics Division, Research and Development, GlaxoSmithKline, Harlow, UK

## Supplementary Research Design

### Details of the Prospective cohorts used in this analysis

**British Regional Heart Study (BRHS):** (1) From 1978 to 1980, 7735 men aged 40-59 were recruited from general practices across the UK. A wide range of phenotypic measures is available for established risk markers such as lipids, blood pressure and inflammatory and haemostatic markers. Most of these measures were taken both at recruitment and re-examination, which occurred in 1998-2000 when men were aged 60-79. At this re-examination 4252 participants attended and DNA was extracted for 3945. A case-control sample was selected using 1095 cases with prevalent data at re-examination or incident cases of CHD or stroke over the next 8 years and 1358 controls. The controls were frequency matched based on being in the same town and within the same fixed 5-year age band as the cases. Data on important behavioural variables such as cigarette and alcohol consumption, as well as physical activity, have been regularly collected through follow up. Well validated outcome variables such as major coronary heart disease, stroke, diabetes, and revascularisation, as well as cause-specific mortality, continue to be collected from medical records almost 30 years after recruitment. (<http://www.ucl.ac.uk/pcph/research-groups-themes/brhs-pub>)

## SUPPLEMENTARY DATA

**British Women's Heart and Health Study (BWHHS):** (2) The British Women's Heart & Health Study (BWHHS) is a prospective cohort study of 4,286 women aged between 60 and 79 at baseline in 1999-2001. Participants were randomly selected from general practice registers in 23 towns across England, Wales and Scotland. The criteria for the sampling frame and clinic protocols were very similar to the 20 year follow-up of BRHS. Baseline measurements included biomarkers and blood samples for DNA extraction taken by research nurses as well as ascertainment of a wide range of phenotypic measures. Follow-up by postal questionnaire was undertaken in 2003, 2007 and 2010-2011. Of the 4,278 participants who gave consent for genetic studies, 15 were defined by the examining nurse as being non-white and were excluded from further analysis. Of the remaining 4,263 women, 3,800 (89%) had DNA available for genotyping. Survival status is obtained from the Data Linkage Service, Health and Social Care Information Centre, London and CVD events have been prospectively studied by biennial review of primary care medical records with validation checks. The UCLEB case-control sample was selected based on 523 cases with prevalent or incident CHD or stroke. 1501 controls were frequency matched based on being in the same town and within the same fixed 5-year age band as the cases. For these analyses prevalent T2D was ascertained from either self-report, medical record review, use of glucose lowering medication, and/or a fasting glucose  $>7\text{mmol/L}$ . Incident T2D to 2007 was determined by self-report, medical record review or use of glucose lowering medication. Ethical approval was granted for the BWHHS from the London Multi-Centre Research Ethics Committee and 23 Local Research Ethics Committees.

**Medical Research Council National Survey of Health and Development (MRC NSHD):** (3) This is an on-going prospective birth cohort study consisting of all births in England, Scotland and Wales in one week in March 1946. The sample includes single, legitimate births whose fathers were in non-manual or agricultural occupations and a randomly selected one in four of all others, whose fathers were in manual labour. The original cohort, now 68 years of age, comprised 2,547 women and 2,815 men who have been followed-up over 20 times since their birth. The data collected to date include repeat cognitive function, physical, lifestyle and anthropomorphic measures, as well as blood analytes and other measures. The cohort recently completed a particularly intensive phase of clinical assessment and biological sampling with blood and urine sampling and analysis, and cardiac and vascular imaging [29](4). DNA was extracted from blood samples collected in 1999 (5). Follow-up for disease outcomes is by self-reports of doctor diagnosed events that have been validated against General Practice (GP) records. (<http://www.nshd.mrc.ac.uk/>).

**Edinburgh Artery Study (EAS):** (6) At baseline (August 1987-September 1988), an age-stratified random sample of men and women, aged 55-74 years, was selected from the age-sex registers of ten general practices with catchment populations spread geographically and socioeconomically throughout the city of Edinburgh. Subjects were excluded if they were unfit to participate (e.g. due to severe mental illness or terminal disease). These exclusions were replaced by other randomly sampled subjects. The study population is almost exclusively European. DNA was extracted at 5 years follow-up. Physical examinations were performed by specially trained research nurses using standardised operating procedures. The quality of clinical measurements were checked before and during the study by repeat measurements taken intermittently by the study co-ordinator. Individual observer measurements were assessed for drift. Blood assays were performed in accredited laboratories using international standards. Subjects have been followed up for 20 years for cardiovascular events, using repeat self-reporting questionnaires, record linkage for hospitalisations and deaths, and validation of events against pre-specified criteria through searching of hospital and GP notes. Comprehensive clinical examination was repeated at 5 and 12 years after commencement of the study, resulting in repeat measurements of several key variables.

## SUPPLEMENTARY DATA

**Whitehall II Study (WHII):** (7) Whitehall II recruitment of 10,308 participants (70% men) between 1985 and 1988 involved 20 London based Civil service departments. Genetic samples were collected in 2004 from over 6,000 participants. The study is highly phenotyped for cardiovascular and other ageing related health outcomes, with 9 phases of follow up (5 with clinical assessment and biological sampling), over 20 years of follow up. A wide variety of health behaviour and 7 environmental data are also collected and the participants are consented for linkage to recorded clinical data such as Hospital Episode Statistics (HES), the Office of National Statistics mortality data and the national registry of acute coronary syndromes in England and Wales (Myocardial Ischaemia National Audit Project). (<http://www.ucl.ac.uk/whitehallII/>)

**English Longitudinal Study of Ageing (ELSA):** (8) This is a national cohort of participants (48% men) aged over 50 years recruited from the Health Surveys for England in 1998, 1999 and 2001. Genetic data were collected at Wave 2 of the study (2004/5). A wide range of phenotypic measures relevant to ageing are available. These measures were made at Wave 0 of the study (1998, 1999 and 2001) and at follow up (2004/5). Data on health behaviours and a wide range of health outcomes are available. Nearly all participants (97%) are also consented to linkage to routine data such as HES, which allows for the assessment of health outcomes and cause specific mortality. A case-control sample was selected using 412 cases and 1573 controls. Controls and cases were matched by sex and 5-year age bands at Wave 2. (<http://www.ifs.org.uk/elsa/>). Age in ELSA was collapsed at 90+ (and coded 90).

**Caerphilly prospective study (CaPS):**(9) This study is based on men aged between 45 to 59 years who resided in the small South Wales town of Caerphilly between the examination dates of 1979 & 1983. Of the 2818 eligible, 2512, (89%) were recruited. The men were studied at baseline (Phase 1) and each subsequent 5 year period (Phase 2–5) and have therefore been followed up for around 20 years. An additional 447 patients were recruited at phase 2. The cohort has a wide range of cardiovascular phenotypes and at phase 3, cognitive function was also assessed, which has been supplemented with clinical dementia and cognitive impairment at phase 5. DNA was extracted from blood samples collected in 1992–1994. Follow-up for disease outcomes is by self-report from participants, who are also linked to hospital episode discharge summaries for validation checks to comply with WHO criteria, as well as death certificates for fatal events.

SUPPLEMENTARY DATA

**Supplementary Table 1.** Details of published T2D risk variants (10) used in the risk analysis and their internal and external odds ratios

| RS number  | CHR | Chr position (hg18) | Gene            | Risk allele/Other | Risk allele freq | external OR -effect from published data | internal OR - effect from combined studies |
|------------|-----|---------------------|-----------------|-------------------|------------------|-----------------------------------------|--------------------------------------------|
| rs10923931 | 1   | 120,319,482         | <i>NOTCH2</i>   | T/G               | 0.12             | 1.08                                    | 1.13                                       |
| rs2075423  | 1   | 212,221,342         | <i>PROX1</i>    | G/T               | 0.62             | 1.07                                    | 1.07                                       |
| rs780094   | 2   | 27,594,741          | <i>GCKR</i>     | C/T               | 0.61             | 1.06                                    | 1.07                                       |
| rs10203174 | 2   | 43,543,534          | <i>THADA</i>    | C/T               | 0.89             | 1.14                                    | 1.10                                       |
| rs243088   | 2   | 60,422,249          | <i>BCL11A</i>   | T/A               | 0.45             | 1.07                                    | 1.04                                       |
| rs7569522  | 2   | 161,054,693         | <i>RBMS1</i>    | A/G               | 0.44             | 1.05                                    | 1.06                                       |
| rs13389219 | 2   | 165,237,122         | <i>GRB14</i>    | C/T               | 0.60             | 1.07                                    | 1.07                                       |
| rs2943640  | 2   | 226,801,829         | <i>IRS1</i>     | C/A               | 0.63             | 1.1                                     | 1.14                                       |
| rs1801282  | 3   | 12,368,125          | <i>PPARG</i>    | C/G               | 0.86             | 1.13                                    | 1.05                                       |
| rs1496653  | 3   | 23,429,794          | <i>UBE2E2</i>   | A/G               | 0.75             | 1.09                                    | 0.93                                       |
| rs12497268 | 3   | 64,065,403          | <i>PSMD6</i>    | G/C               | 0.80             | 1.03                                    | 1.04                                       |
| rs6795735  | 3   | 64,680,405          | <i>ADAMTS9</i>  | C/T               | 0.59             | 1.08                                    | 0.98                                       |
| rs11717195 | 3   | 124,565,088         | <i>ADCY5</i>    | T/C               | 0.77             | 1.11                                    | 1.07                                       |
| rs4402960  | 3   | 186,994,381         | <i>IGF2BP2</i>  | T/G               | 0.33             | 1.13                                    | 1.18                                       |
| rs17301514 | 3   | 188,096,103         | <i>ST64GAL1</i> | A/G               | 0.13             | 1.05                                    | 1.01                                       |
| rs6819243  | 4   | 1,283,245           | <i>MAEA</i>     | T/C               | 0.96             | 1.07                                    | 1.32                                       |
| rs4458523  | 4   | 6,340,887           | <i>WFS1</i>     | G/T               | 0.57             | 1.1                                     | 1.07                                       |
| rs459193   | 5   | 55,842,508          | <i>ANKRD55</i>  | G/A               | 0.70             | 1.08                                    | 1.03                                       |
| rs6878122  | 5   | 76,463,067          | <i>ZBED3</i>    | G/A               | 0.28             | 1.1                                     | 0.98                                       |
| rs7756992  | 6   | 20,787,688          | <i>CDKAL1</i>   | G/A               | 0.29             | 1.17                                    | 1.19                                       |
| rs4299828  | 6   | 38,285,645          | <i>ZFAND3</i>   | A/G               | 0.79             | 1.04                                    | 0.96                                       |
| rs3734621  | 6   | 39,412,189          | <i>KCNK16</i>   | C/A               | 0.03             | 1.07                                    | 1.27                                       |
| rs17168486 | 7   | 14,864,807          | <i>DGKB</i>     | T/C               | 0.19             | 1.11                                    | 1.02                                       |
| rs849135   | 7   | 28,162,938          | <i>JAZF1</i>    | G/A               | 0.52             | 1.11                                    | 1.14                                       |
| rs10278336 | 7   | 44,211,888          | <i>GCK</i>      | A/G               | 0.50             | 1.07                                    | 1.00                                       |
| rs17867832 | 7   | 126,784,073         | <i>GCCI</i>     | T/G               | 0.91             | 1.09                                    | 0.94                                       |
| rs13233731 | 7   | 130,088,229         | <i>KLF14</i>    | G/A               | 0.51             | 1.05                                    | 0.99                                       |
| rs516946   | 8   | 41,638,405          | <i>ANK1</i>     | C/T               | 0.76             | 1.09                                    | 0.99                                       |
| rs7845219  | 8   | 96,006,678          | <i>TP53INP1</i> | T/C               | 0.52             | 1.06                                    | 1.11                                       |
| rs3802177  | 8   | 118,254,206         | <i>SLC30A8</i>  | G/A               | 0.66             | 1.14                                    | 1.09                                       |
| rs10758593 | 9   | 4,282,083           | <i>GLIS3</i>    | A/G               | 0.42             | 1.06                                    | 0.95                                       |

SUPPLEMENTARY DATA

|            |    |             |                       |     |      |      |      |
|------------|----|-------------|-----------------------|-----|------|------|------|
| rs16927668 | 9  | 8,359,533   | <i>PTPRD</i>          | T/C | 0.24 | 1.04 | 1.11 |
| rs10811661 | 9  | 22,124,094  | <i>CDKN2A/B</i>       | T/C | 0.82 | 1.18 | 1.18 |
| rs17791513 | 9  | 81,095,410  | <i>TLE4</i>           | A/G | 0.91 | 1.12 | 1.43 |
| rs2796441  | 9  | 83,498,768  | <i>TLE1</i>           | G/A | 0.57 | 1.07 | 1.08 |
| rs11257655 | 10 | 12,347,900  | <i>CDC123/CAMK1D</i>  | T/C | 0.23 | 1.07 | 1.05 |
| rs12242953 | 10 | 70,535,348  | <i>VPS26A</i>         | G/A | 0.93 | 1.07 | 0.96 |
| rs12571751 | 10 | 80,612,637  | <i>ZMIZ1</i>          | A/G | 0.52 | 1.08 | 1.11 |
| rs1111875  | 10 | 94,452,862  | <i>HHEX/IDE</i>       | C/T | 0.58 | 1.11 | 1.02 |
| rs7903146  | 10 | 114,748,339 | <i>TCF7L2</i>         | T/C | 0.27 | 1.39 | 1.32 |
| rs2334499  | 11 | 1,653,425   | <i>DUSP8</i>          | T/C | 0.43 | 1.04 | 1.07 |
| rs163184   | 11 | 2,803,645   | <i>KCNQ1</i>          | G/T | 0.50 | 1.09 | 1.11 |
| rs5215     | 11 | 17,365,206  | <i>KCNJ11</i>         | C/T | 0.41 | 1.07 | 1.16 |
| rs1552224  | 11 | 72,110,746  | <i>ARAP1 (CENTD2)</i> | A/C | 0.81 | 1.11 | 1.14 |
| rs10830963 | 11 | 92,348,358  | <i>MTNR1B</i>         | G/C | 0.31 | 1.1  | 1.07 |
| rs11063069 | 12 | 4,244,634   | <i>CCND2</i>          | G/A | 0.21 | 1.08 | 1.04 |
| rs10842994 | 12 | 27,856,417  | <i>KLHDC5</i>         | C/T | 0.80 | 1.1  | 1.11 |
| rs2261181  | 12 | 64,498,585  | <i>HMG2</i>           | T/C | 0.10 | 1.13 | 1.04 |
| rs7955901  | 12 | 69,719,560  | <i>TSPAN8/LGR5</i>    | C/T | 0.45 | 1.07 | 0.93 |
| rs12427353 | 12 | 119,911,284 | <i>HNF1A (TCF1)</i>   | G/C | 0.79 | 1.08 | 1.08 |
| rs1359790  | 13 | 79,615,157  | <i>SPRY2</i>          | G/A | 0.72 | 1.08 | 1.08 |
| rs4502156  | 15 | 60,170,447  | <i>C2CD4A</i>         | T/C | 0.52 | 1.06 | 1.06 |
| rs7177055  | 15 | 75,619,817  | <i>HMG20A</i>         | A/G | 0.68 | 1.08 | 1.09 |
| rs11634397 | 15 | 78,219,277  | <i>ZFAND6</i>         | G/A | 0.64 | 1.05 | 1.08 |
| rs2007084  | 15 | 88,146,339  | <i>AP3S2</i>          | G/A | 0.92 | 1.02 | 1.07 |
| rs12899811 | 15 | 89,345,080  | <i>PRC1</i>           | G/A | 0.31 | 1.08 | 0.97 |
| rs9936385  | 16 | 52,376,670  | <i>FTO</i>            | C/T | 0.41 | 1.13 | 1.18 |
| rs7202877  | 16 | 73,804,746  | <i>BCAR1</i>          | T/G | 0.89 | 1.12 | 1.00 |
| rs2447090  | 17 | 2,245,724   | <i>SRR</i>            | A/G | 0.62 | 1.04 | 0.95 |
| rs11651052 | 17 | 33,176,494  | <i>HNF1B (TCF2)</i>   | A/G | 0.44 | 1.1  | 1.02 |
| rs12970134 | 18 | 56,035,730  | <i>MC4R</i>           | A/G | 0.27 | 1.08 | 1.08 |
| rs10401969 | 19 | 19,268,718  | <i>CILP2</i>          | C/T | 0.08 | 1.13 | 1.05 |
| rs8182584  | 19 | 38,601,550  | <i>PEPD</i>           | T/G | 0.38 | 1.04 | 1.08 |
| rs8108269  | 19 | 50,850,353  | <i>GIPR</i>           | G/T | 0.31 | 1.07 | 1.03 |
| rs4812829  | 20 | 42,422,681  | <i>HNF4A</i>          | A/G | 0.19 | 1.06 | 1.09 |

SUPPLEMENTARY DATA

**Supplementary Table 2.** Odds ratios by study for the Framingham Offspring T2D score, the externally weighted gene score and the two combined for each of the seven studies

|                                             | BRHS                   | BWHHS                  | EAS               | MRC NSHD               | WHII                   | ELSA                   | CAPS                   | Total                    |
|---------------------------------------------|------------------------|------------------------|-------------------|------------------------|------------------------|------------------------|------------------------|--------------------------|
| <b>FORS</b>                                 |                        |                        |                   |                        |                        |                        |                        |                          |
| OR per SD increase (95% CI)                 | 2.47 (2.05-2.98)       | 3.16 (2.40-4.16)       | 1.87 (1.10-3.17)  | 3.45 (2.60-4.59)       | 2.53 (2.20-2.92)       | 2.34 (1.80-3.03)       | 3.11 (2.52-3.84)       | 2.70 (2.48-2.93)         |
| P value                                     | 5.46x10 <sup>-21</sup> | 2.21x10 <sup>-16</sup> | 0.02              | 1.23x10 <sup>-17</sup> | 5.83x10 <sup>-38</sup> | 2.02x10 <sup>-10</sup> | 9.60x10 <sup>-26</sup> | P=5.4x10 <sup>-121</sup> |
| OR Top vs. bottom quintile (95% CI)         | 25.40 (6.19-104.19)    | 12.52 (3.04-51.60)     | *                 | 23.87 (3.31-172.40)    | 17.37 (10.73-28.12)    | 19.44 (4.58-82.50)     | 22.33 (7.93-62.91)     | 21.07 (14.86-29.88)      |
| P value                                     | 7.12x10 <sup>-6</sup>  | 0.0005                 |                   | 0.002                  | 3.26x10 <sup>-31</sup> | 0.00006                | 4.10x10 <sup>-9</sup>  | 1.48x10 <sup>-65</sup>   |
| <b>Externally weighted gene score</b>       |                        |                        |                   |                        |                        |                        |                        |                          |
| OR per SD increase (95% CI)                 | 1.41 (1.19-1.67)       | 1.39 (1.14-1.70)       | 1.59 (0.98-2.57)  | 1.53 (1.27-1.85)       | 1.25 (1.09-1.44)       | 1.60 (1.27-2.01)       | 1.63 (1.35-1.98)       | 1.43 (1.33-1.54)         |
| P value                                     | 0.00008                | 0.001                  | 0.06              | 9.00x10 <sup>-6</sup>  | 0.001                  | 0.0001                 | 4.42x10 <sup>-7</sup>  | P=2.25x10 <sup>-22</sup> |
| OR Top vs. bottom quintile (95% CI)         | 2.42 (1.36-4.30)       | 2.46 (1.33-4.57)       | 1.78 (0.29-10.84) | 4.01 (1.99-8.11)       | 1.99 (1.28-3.09)       | 3.72 (1.66-8.35)       | 3.72 (1.94-7.13)       | 2.70 (2.12-3.43)         |
| P value                                     | 0.003                  | 0.004                  | 0.53              | 0.0001                 | 0.002                  | 0.001                  | 0.00008                | P=7.03x10 <sup>-16</sup> |
| <b>FORS+ externally weighted gene score</b> |                        |                        |                   |                        |                        |                        |                        |                          |
| OR per SD increase (95% CI)                 | 2.62 (2.17-3.17)       | 3.34 (2.54-4.38)       | 2.10 (1.23-3.57)  | 3.85 (2.90-5.11)       | 2.53 (2.19-2.91)       | 2.61 (2.00-3.39)       | 3.29 (2.65-4.07)       | 2.83 (2.61-3.08)         |
| P value                                     | 3.77x10 <sup>-23</sup> | 4.32x10 <sup>-18</sup> | 0.006             | 1.16x10 <sup>-20</sup> | 1.27x10 <sup>-37</sup> | 1.00x10 <sup>-12</sup> | 1.79x10 <sup>-27</sup> | 3.08x10 <sup>-132</sup>  |
| OR Top vs. bottom quintile (95% CI)         | 60.29 (8.34-435.59)    | 25.15 (3.47-182.35)    | -                 | 13.21 (3.22-54.12)     | 16.02 (9.88-25.98)     | 25.31 (6.05-105.94)    | 33.55 (10.35-108.78)   | 22.59 (15.75-32.41)      |
| P value                                     | 0.00005                | 0.001                  |                   | 0.0003                 | 2.32x10 <sup>-29</sup> | 9.87x10 <sup>-6</sup>  | 4.92x10 <sup>-9</sup>  | 1.24x10 <sup>-63</sup>   |

\*Not calculated because of zero counts in the bottom quintile

SUPPLEMENTARY DATA

**Supplementary Table 3.** Association of the 65 T2D risk SNPs with traits of interest (significance level  $p < 0.0008$  after Bonferroni correction).

After correction for multiple testing, eight of the variants contributing to the T2D genetic risk score were also associated with non-genetic variables included in the FORS algorithm: *MC4R* and *FTO* with BMI, *GCK*, *SLC30A8* and *TCF7L2* with fasting glucose, *IRS1* with HDL-cholesterol, *GCKR* and *CILP2* with triglyceride concentration.

**a) Body Mass Index**

| Nearest gene(s) | SNP        | Effect allele | b      | se    | P value               |
|-----------------|------------|---------------|--------|-------|-----------------------|
| FTO             | rs9936385  | C             | 0.238  | 0.05  | $1.94 \times 10^{-6}$ |
| MC4R            | rs12970134 | A             | 0.229  | 0.055 | $3.13 \times 10^{-5}$ |
| THADA           | rs10203174 | C             | -0.195 | 0.076 | 0.01                  |
| SLC30A8         | rs3802177  | G             | -0.129 | 0.052 | 0.014                 |
| C2CD4A          | rs4502156  | T             | -0.11  | 0.049 | 0.024                 |
| AP3S2           | rs2007084  | G             | 0.192  | 0.086 | 0.025                 |
| MAEA            | rs6819243  | T             | 0.313  | 0.159 | 0.05                  |
| CDKAL1          | rs7756992  | G             | -0.101 | 0.055 | 0.066                 |
| ANKRD55         | rs459193   | G             | -0.093 | 0.055 | 0.094                 |
| IGF2BP2         | rs4402960  | T             | -0.076 | 0.053 | 0.15                  |
| VPS26A          | rs12242953 | G             | -0.133 | 0.098 | 0.177                 |
| SPRY2           | rs1359790  | G             | 0.071  | 0.053 | 0.18                  |
| GRB14           | rs13389219 | C             | -0.065 | 0.049 | 0.188                 |
| ANK1            | rs516946   | C             | -0.071 | 0.057 | 0.21                  |
| HMG20A          | rs7177055  | A             | 0.065  | 0.054 | 0.226                 |
| DGKB            | rs17168486 | T             | -0.077 | 0.064 | 0.229                 |
| KLF14           | rs13233731 | G             | -0.057 | 0.049 | 0.242                 |
| GCKR            | rs780094   | C             | 0.058  | 0.05  | 0.245                 |
| KCNQ1           | rs163184   | G             | 0.054  | 0.048 | 0.262                 |
| TSPAN8/LGR5     | rs7955901  | C             | -0.054 | 0.049 | 0.268                 |
| CDC123/CAMK1D   | rs11257655 | T             | 0.064  | 0.06  | 0.289                 |
| UBE2E2          | rs1496653  | A             | -0.061 | 0.06  | 0.308                 |
| GCK             | rs10278336 | A             | -0.048 | 0.049 | 0.33                  |
| ADCY5           | rs11717195 | T             | -0.054 | 0.056 | 0.336                 |
| GLIS3           | rs10758593 | A             | -0.042 | 0.049 | 0.386                 |
| ADAMTS9         | rs6795735  | C             | -0.042 | 0.049 | 0.392                 |
| RBMS1           | rs7569522  | A             | -0.041 | 0.048 | 0.395                 |
| ZFAND6          | rs11634397 | G             | -0.041 | 0.051 | 0.423                 |
| KLHDC5          | rs10842994 | C             | -0.047 | 0.06  | 0.431                 |
| JAZF1           | rs849135   | G             | -0.036 | 0.048 | 0.457                 |
| TP53INP1        | rs7845219  | T             | 0.035  | 0.048 | 0.467                 |
| CILP2           | rs10401969 | C             | -0.065 | 0.091 | 0.478                 |



SUPPLEMENTARY DATA

|                |            |   |        |       |       |
|----------------|------------|---|--------|-------|-------|
| CCND2          | rs11063069 | G | -0.041 | 0.059 | 0.482 |
| KCNJ11         | rs5215     | C | -0.035 | 0.051 | 0.485 |
| PEPD           | rs8182584  | T | 0.033  | 0.05  | 0.505 |
| HHEX/IDE       | rs1111875  | C | -0.028 | 0.049 | 0.571 |
| ZMIZ1          | rs12571751 | A | 0.024  | 0.048 | 0.621 |
| MTNR1B         | rs10830963 | G | 0.026  | 0.054 | 0.631 |
| ST64GAL1       | rs17301514 | A | 0.036  | 0.078 | 0.648 |
| DUSP8          | rs2334499  | T | -0.022 | 0.049 | 0.657 |
| HNF4A          | rs4812829  | A | 0.029  | 0.066 | 0.664 |
| HMGA2          | rs2261181  | T | 0.035  | 0.083 | 0.669 |
| TCF7L2         | rs7903146  | T | -0.022 | 0.053 | 0.681 |
| IRS1           | rs2943640  | C | -0.017 | 0.05  | 0.743 |
| CDKN2A/B       | rs10811661 | T | 0.02   | 0.064 | 0.761 |
| HNF1B (TCF2)   | rs11651052 | A | 0.014  | 0.048 | 0.765 |
| TLE4           | rs17791513 | A | 0.028  | 0.1   | 0.779 |
| WFS1           | rs4458523  | G | -0.011 | 0.049 | 0.83  |
| KCNK16         | rs3734621  | C | 0.033  | 0.156 | 0.831 |
| GIPR           | rs8108269  | G | 0.011  | 0.054 | 0.839 |
| BCL11A         | rs243088   | T | -0.01  | 0.048 | 0.841 |
| ARAP1 (CENTD2) | rs1552224  | A | -0.013 | 0.067 | 0.842 |
| HNF1A (TCF1)   | rs12427353 | G | -0.01  | 0.061 | 0.869 |
| NOTCH2         | rs10923931 | T | 0.013  | 0.078 | 0.87  |
| PSMD6          | rs12497268 | G | 0.01   | 0.064 | 0.872 |
| BCAR1          | rs7202877  | T | 0.013  | 0.082 | 0.877 |
| PROX1          | rs2075423  | G | -0.007 | 0.051 | 0.896 |
| SRR            | rs2447090  | A | 0.005  | 0.05  | 0.921 |
| PTPRD          | rs16927668 | T | 0.006  | 0.06  | 0.922 |
| GCC1           | rs17867832 | T | 0.01   | 0.119 | 0.933 |
| PPARG          | rs1801282  | C | -0.006 | 0.073 | 0.933 |
| TLE1           | rs2796441  | G | -0.004 | 0.049 | 0.937 |
| ZBED3          | rs6878122  | G | -0.004 | 0.052 | 0.94  |
| ZFAND3         | rs4299828  | A | 0.002  | 0.061 | 0.977 |
| PRC1           | rs12899811 | G | 0.001  | 0.053 | 0.979 |

SUPPLEMENTARY DATA

b) Glucose

| Nearest gene(s) | SNP        | Effect allele | b      | se    | P value               |
|-----------------|------------|---------------|--------|-------|-----------------------|
| TCF7L2          | rs7903146  | T             | 0.052  | 0.011 | 2.28x10 <sup>-7</sup> |
| GCK             | rs10278336 | A             | 0.041  | 0.01  | 4.13x10 <sup>-5</sup> |
| SLC30A8         | rs3802177  | G             | 0.039  | 0.011 | 0.000392              |
| GLIS3           | rs10758593 | A             | 0.035  | 0.01  | 0.001                 |
| PROX1           | rs2075423  | G             | 0.031  | 0.011 | 0.003                 |
| MTNR1B          | rs10830963 | G             | 0.034  | 0.011 | 0.003                 |
| BCL11A          | rs243088   | T             | 0.027  | 0.01  | 0.008                 |
| JAZF1           | rs849135   | G             | 0.027  | 0.01  | 0.009                 |
| CDKAL1          | rs7756992  | G             | 0.03   | 0.011 | 0.009                 |
| KLHDC5          | rs10842994 | C             | 0.033  | 0.013 | 0.01                  |
| HNF1A (TCF1)    | rs12427353 | G             | 0.031  | 0.013 | 0.014                 |
| UBE2E2          | rs1496653  | A             | 0.031  | 0.012 | 0.014                 |
| KCNQ1           | rs163184   | G             | 0.023  | 0.01  | 0.023                 |
| IRS1            | rs2943640  | C             | 0.024  | 0.011 | 0.026                 |
| ADCY5           | rs11717195 | T             | 0.023  | 0.012 | 0.049                 |
| CDKN2A/B        | rs10811661 | T             | 0.025  | 0.013 | 0.059                 |
| TP53INP1        | rs7845219  | T             | 0.019  | 0.01  | 0.063                 |
| THADA           | rs10203174 | C             | 0.027  | 0.016 | 0.088                 |
| HMG20A          | rs7177055  | A             | 0.017  | 0.011 | 0.12                  |
| ANKRD55         | rs459193   | G             | 0.018  | 0.012 | 0.122                 |
| ARAP1 (CENTD2)  | rs1552224  | A             | 0.022  | 0.014 | 0.123                 |
| GCKR            | rs780094   | C             | 0.015  | 0.01  | 0.165                 |
| SRR             | rs2447090  | A             | -0.013 | 0.01  | 0.224                 |
| TLE1            | rs2796441  | G             | 0.012  | 0.01  | 0.231                 |
| HNF4A           | rs4812829  | A             | -0.017 | 0.014 | 0.234                 |
| ZBED3           | rs6878122  | G             | 0.012  | 0.011 | 0.269                 |
| TSPAN8/LGR5     | rs7955901  | C             | -0.011 | 0.01  | 0.276                 |
| SPRY2           | rs1359790  | G             | -0.011 | 0.011 | 0.302                 |
| HMGA2           | rs2261181  | T             | -0.018 | 0.017 | 0.302                 |
| FTO             | rs9936385  | C             | 0.011  | 0.01  | 0.302                 |
| PSMD6           | rs12497268 | G             | -0.013 | 0.013 | 0.332                 |
| HNF1B (TCF2)    | rs11651052 | A             | 0.01   | 0.01  | 0.34                  |
| ANK1            | rs516946   | C             | 0.011  | 0.012 | 0.346                 |
| C2CD4A          | rs4502156  | T             | -0.009 | 0.01  | 0.384                 |
| CCND2           | rs11063069 | G             | -0.011 | 0.012 | 0.393                 |
| GIPR            | rs8108269  | G             | 0.009  | 0.011 | 0.402                 |
| CDC123/CAMK1D   | rs11257655 | T             | 0.01   | 0.013 | 0.411                 |
| DUSP8           | rs2334499  | T             | -0.008 | 0.01  | 0.412                 |
| HHEX/IDE        | rs1111875  | C             | 0.008  | 0.01  | 0.422                 |

SUPPLEMENTARY DATA

|          |            |   |        |       |       |
|----------|------------|---|--------|-------|-------|
| TLE4     | rs17791513 | A | 0.016  | 0.021 | 0.459 |
| NOTCH2   | rs10923931 | T | -0.012 | 0.016 | 0.465 |
| PRC1     | rs12899811 | G | -0.008 | 0.011 | 0.488 |
| VPS26A   | rs12242953 | G | 0.014  | 0.021 | 0.509 |
| KCNJ11   | rs5215     | C | -0.007 | 0.011 | 0.526 |
| PPARG    | rs1801282  | C | 0.01   | 0.015 | 0.531 |
| ZFAND3   | rs4299828  | A | -0.008 | 0.013 | 0.555 |
| IGF2BP2  | rs4402960  | T | 0.006  | 0.011 | 0.557 |
| GRB14    | rs13389219 | C | 0.005  | 0.01  | 0.636 |
| MAEA     | rs6819243  | T | -0.015 | 0.033 | 0.659 |
| ST64GAL1 | rs17301514 | A | -0.007 | 0.016 | 0.681 |
| DGKB     | rs17168486 | T | 0.005  | 0.013 | 0.683 |
| ADAMTS9  | rs6795735  | C | -0.004 | 0.01  | 0.718 |
| WFS1     | rs4458523  | G | 0.003  | 0.01  | 0.796 |
| ZMIZ1    | rs12571751 | A | 0.003  | 0.01  | 0.796 |
| BCAR1    | rs7202877  | T | 0.004  | 0.017 | 0.833 |
| ZFAND6   | rs11634397 | G | 0.002  | 0.011 | 0.86  |
| RBMS1    | rs7569522  | A | -0.002 | 0.01  | 0.863 |
| KLF14    | rs13233731 | G | -0.002 | 0.01  | 0.867 |
| GCC1     | rs17867832 | T | 0.004  | 0.025 | 0.872 |
| MC4R     | rs12970134 | A | -0.002 | 0.011 | 0.874 |
| KCNK16   | rs3734621  | C | -0.004 | 0.033 | 0.91  |
| PTPRD    | rs16927668 | T | -0.001 | 0.013 | 0.911 |
| AP3S2    | rs2007084  | G | 0.001  | 0.018 | 0.943 |
| CILP2    | rs10401969 | C | -0.001 | 0.019 | 0.952 |
| PEPD     | rs8182584  | T | 0      | 0.01  | 0.996 |

SUPPLEMENTARY DATA

c) HDL

| Nearest gene(s) | SNP        | Effect allele | b      | se    | p-value                |
|-----------------|------------|---------------|--------|-------|------------------------|
| IRS1            | rs2943640  | C             | -0.021 | 0.005 | 2.67 x10 <sup>-5</sup> |
| ANKRD55         | rs459193   | G             | -0.016 | 0.005 | 0.002                  |
| GCK             | rs10278336 | A             | -0.011 | 0.005 | 0.013                  |
| C2CD4A          | rs4502156  | T             | 0.01   | 0.005 | 0.023                  |
| SPRY2           | rs1359790  | G             | 0.008  | 0.005 | 0.11                   |
| HMG20A          | rs7177055  | A             | -0.008 | 0.005 | 0.111                  |
| KCNQ1           | rs163184   | G             | -0.007 | 0.005 | 0.145                  |
| WFS1            | rs4458523  | G             | -0.007 | 0.005 | 0.146                  |
| JAZF1           | rs849135   | G             | 0.006  | 0.005 | 0.18                   |
| PPARG           | rs1801282  | C             | -0.009 | 0.007 | 0.181                  |
| BCAR1           | rs7202877  | T             | -0.01  | 0.008 | 0.207                  |
| AP3S2           | rs2007084  | G             | 0.01   | 0.008 | 0.208                  |
| NOTCH2          | rs10923931 | T             | 0.009  | 0.007 | 0.211                  |
| TSPAN8/LGR5     | rs7955901  | C             | 0.006  | 0.005 | 0.217                  |
| ZMIZ1           | rs12571751 | A             | -0.006 | 0.004 | 0.217                  |
| GCKR            | rs780094   | C             | -0.006 | 0.005 | 0.229                  |
| PRC1            | rs12899811 | G             | 0.006  | 0.005 | 0.235                  |
| TP53INP1        | rs7845219  | T             | -0.005 | 0.005 | 0.238                  |
| MTNR1B          | rs10830963 | G             | 0.006  | 0.005 | 0.251                  |
| CCND2           | rs11063069 | G             | -0.006 | 0.005 | 0.252                  |
| ST6GAL1         | rs17301514 | A             | -0.007 | 0.007 | 0.309                  |
| UBE2E2          | rs1496653  | A             | 0.006  | 0.006 | 0.309                  |
| KLF14           | rs13233731 | G             | -0.004 | 0.005 | 0.338                  |
| HNF1A (TCF1)    | rs12427353 | G             | 0.005  | 0.006 | 0.354                  |
| MC4R            | rs12970134 | A             | -0.005 | 0.005 | 0.357                  |
| ADCY5           | rs11717195 | T             | 0.005  | 0.005 | 0.373                  |
| FTO             | rs9936385  | C             | -0.004 | 0.005 | 0.378                  |
| KLHDC5          | rs10842994 | C             | 0.005  | 0.006 | 0.382                  |
| DGKB            | rs17168486 | T             | 0.005  | 0.006 | 0.39                   |
| THADA           | rs10203174 | C             | 0.006  | 0.007 | 0.406                  |
| CILP2           | rs10401969 | C             | -0.007 | 0.008 | 0.423                  |
| ZFAND3          | rs4299828  | A             | 0.004  | 0.006 | 0.427                  |
| DUSP8           | rs2334499  | T             | -0.004 | 0.005 | 0.435                  |
| HNF4A           | rs4812829  | A             | -0.005 | 0.006 | 0.444                  |
| VPS26A          | rs12242953 | G             | -0.007 | 0.009 | 0.473                  |
| SRR             | rs2447090  | A             | 0.003  | 0.005 | 0.492                  |
| PTPRD           | rs16927668 | T             | 0.004  | 0.006 | 0.516                  |
| GIPR            | rs8108269  | G             | -0.003 | 0.005 | 0.547                  |
| HNF1B (TCF2)    | rs11651052 | A             | 0.003  | 0.004 | 0.547                  |

SUPPLEMENTARY DATA

|                |            |   |        |       |       |
|----------------|------------|---|--------|-------|-------|
| TLE4           | rs17791513 | A | 0.006  | 0.009 | 0.549 |
| ADAMTS9        | rs6795735  | C | -0.003 | 0.005 | 0.552 |
| KCNJ11         | rs5215     | C | -0.003 | 0.005 | 0.575 |
| GLIS3          | rs10758593 | A | 0.002  | 0.005 | 0.614 |
| ANK1           | rs516946   | C | 0.002  | 0.005 | 0.649 |
| CDC123/CAMK1D  | rs11257655 | T | -0.002 | 0.006 | 0.661 |
| SLC30A8        | rs3802177  | G | 0.002  | 0.005 | 0.673 |
| CDKN2A/B       | rs10811661 | T | -0.002 | 0.006 | 0.679 |
| ARAP1 (CENTD2) | rs1552224  | A | 0.002  | 0.006 | 0.694 |
| CDKAL1         | rs7756992  | G | 0.002  | 0.005 | 0.716 |
| BCL11A         | rs243088   | T | -0.002 | 0.004 | 0.727 |
| KCNK16         | rs3734621  | C | -0.005 | 0.015 | 0.735 |
| MAEA           | rs6819243  | T | 0.005  | 0.015 | 0.75  |
| GCC1           | rs17867832 | T | 0.003  | 0.011 | 0.775 |
| PEPD           | rs8182584  | T | -0.001 | 0.005 | 0.781 |
| ZFAND6         | rs11634397 | G | 0.001  | 0.005 | 0.789 |
| HMGA2          | rs2261181  | T | -0.002 | 0.008 | 0.807 |
| GRB14          | rs13389219 | C | -0.001 | 0.005 | 0.846 |
| PROX1          | rs2075423  | G | -0.001 | 0.005 | 0.872 |
| PSMD6          | rs12497268 | G | 0.001  | 0.006 | 0.901 |
| TCF7L2         | rs7903146  | T | -0.001 | 0.005 | 0.917 |
| IGF2BP2        | rs4402960  | T | 0      | 0.005 | 0.931 |
| TLE1           | rs2796441  | G | 0      | 0.005 | 0.938 |
| RBMS1          | rs7569522  | A | 0      | 0.005 | 0.963 |
| HHEX/IDE       | rs1111875  | C | 0      | 0.005 | 0.988 |
| ZBED3          | rs6878122  | G | 0      | 0.005 | 0.995 |

SUPPLEMENTARY DATA

**d) Systolic Blood pressure**

| Nearest gene(s) | SNP        | Effect allele | b      | se    | p-value |
|-----------------|------------|---------------|--------|-------|---------|
| FTO             | rs9936385  | C             | 0.768  | 0.262 | 0.003   |
| IRS1            | rs2943640  | C             | 0.765  | 0.266 | 0.004   |
| IGF2BP2         | rs4402960  | T             | 0.757  | 0.277 | 0.006   |
| PRC1            | rs12899811 | G             | -0.6   | 0.278 | 0.031   |
| RBMS1           | rs7569522  | A             | 0.388  | 0.255 | 0.128   |
| MAEA            | rs6819243  | T             | 1.261  | 0.839 | 0.133   |
| TLE1            | rs2796441  | G             | 0.384  | 0.259 | 0.138   |
| ADCY5           | rs11717195 | T             | -0.41  | 0.295 | 0.164   |
| KCNK16          | rs3734621  | C             | -1.098 | 0.821 | 0.181   |
| KLF14           | rs13233731 | G             | -0.34  | 0.257 | 0.185   |
| TP53INP1        | rs7845219  | T             | 0.329  | 0.255 | 0.197   |
| CDKAL1          | rs7756992  | G             | 0.357  | 0.288 | 0.216   |
| SLC30A8         | rs3802177  | G             | 0.313  | 0.276 | 0.256   |
| AP3S2           | rs2007084  | G             | -0.505 | 0.453 | 0.265   |
| GRB14           | rs13389219 | C             | 0.274  | 0.26  | 0.292   |
| TLE4            | rs17791513 | A             | 0.534  | 0.527 | 0.311   |
| SRR             | rs2447090  | A             | 0.242  | 0.264 | 0.36    |
| HMGA2           | rs2261181  | T             | -0.392 | 0.436 | 0.369   |
| ANK1            | rs516946   | C             | 0.27   | 0.3   | 0.369   |
| BCL11A          | rs243088   | T             | -0.224 | 0.253 | 0.376   |
| CCND2           | rs11063069 | G             | 0.272  | 0.31  | 0.381   |
| HHEX/IDE        | rs1111875  | C             | -0.224 | 0.259 | 0.389   |
| KCNJ11          | rs5215     | C             | -0.219 | 0.267 | 0.411   |
| MTNR1B          | rs10830963 | G             | -0.228 | 0.285 | 0.425   |
| HNF1B (TCF2)    | rs11651052 | A             | -0.199 | 0.254 | 0.435   |
| MC4R            | rs12970134 | A             | -0.222 | 0.288 | 0.441   |
| BCAR1           | rs7202877  | T             | 0.326  | 0.431 | 0.449   |
| DUSP8           | rs2334499  | T             | 0.188  | 0.258 | 0.466   |
| HMG20A          | rs7177055  | A             | -0.204 | 0.283 | 0.469   |
| CILP2           | rs10401969 | C             | -0.347 | 0.481 | 0.47    |
| CDKN2A/B        | rs10811661 | T             | 0.244  | 0.339 | 0.472   |
| GLIS3           | rs10758593 | A             | -0.176 | 0.258 | 0.494   |
| PROX1           | rs2075423  | G             | -0.18  | 0.268 | 0.502   |
| PTPRD           | rs16927668 | T             | -0.207 | 0.317 | 0.514   |
| TCF7L2          | rs7903146  | T             | 0.184  | 0.282 | 0.515   |
| TSPAN8/LGR5     | rs7955901  | C             | -0.163 | 0.256 | 0.524   |
| CDC123/CAMK1D   | rs11257655 | T             | 0.201  | 0.316 | 0.525   |
| PSMD6           | rs12497268 | G             | -0.211 | 0.335 | 0.53    |
| DGKB            | rs17168486 | T             | -0.213 | 0.339 | 0.53    |

SUPPLEMENTARY DATA

|                |            |   |        |       |       |
|----------------|------------|---|--------|-------|-------|
| SPRY2          | rs1359790  | G | -0.16  | 0.279 | 0.565 |
| ADAMTS9        | rs6795735  | C | -0.146 | 0.258 | 0.573 |
| NOTCH2         | rs10923931 | T | -0.225 | 0.413 | 0.585 |
| GIPR           | rs8108269  | G | 0.154  | 0.285 | 0.59  |
| PPARG          | rs1801282  | C | -0.203 | 0.385 | 0.598 |
| WFS1           | rs4458523  | G | 0.117  | 0.258 | 0.65  |
| HNF1A (TCF1)   | rs12427353 | G | -0.14  | 0.321 | 0.663 |
| VPS26A         | rs12242953 | G | -0.208 | 0.519 | 0.689 |
| ARAP1 (CENTD2) | rs1552224  | A | -0.137 | 0.352 | 0.697 |
| JAZF1          | rs849135   | G | -0.088 | 0.255 | 0.73  |
| KLHDC5         | rs10842994 | C | -0.107 | 0.317 | 0.736 |
| UBE2E2         | rs1496653  | A | 0.106  | 0.314 | 0.736 |
| PEPD           | rs8182584  | T | 0.085  | 0.264 | 0.747 |
| GCKR           | rs780094   | C | 0.084  | 0.263 | 0.751 |
| GCC1           | rs17867832 | T | 0.176  | 0.625 | 0.778 |
| KCNQ1          | rs163184   | G | -0.069 | 0.255 | 0.788 |
| ANKRD55        | rs459193   | G | 0.074  | 0.292 | 0.801 |
| GCK            | rs10278336 | A | 0.063  | 0.258 | 0.807 |
| C2CD4A         | rs4502156  | T | 0.059  | 0.258 | 0.819 |
| ST64GAL1       | rs17301514 | A | -0.079 | 0.41  | 0.846 |
| ZFAND6         | rs11634397 | G | 0.051  | 0.268 | 0.851 |
| ZFAND3         | rs4299828  | A | -0.056 | 0.32  | 0.862 |
| ZBED3          | rs6878122  | G | -0.012 | 0.274 | 0.964 |
| ZMIZ1          | rs12571751 | A | 0.009  | 0.254 | 0.972 |
| THADA          | rs10203174 | C | -0.011 | 0.399 | 0.978 |
| HNF4A          | rs4812829  | A | 0.003  | 0.35  | 0.994 |

SUPPLEMENTARY DATA

e) Triglycerides

| Nearest gene(s) | SNP        | Effect allele | b      | se    | p-value                |
|-----------------|------------|---------------|--------|-------|------------------------|
| GCKR            | rs780094   | C             | -0.103 | 0.014 | 1.88x10 <sup>-13</sup> |
| CILP2           | rs10401969 | C             | -0.108 | 0.026 | 3.27x10 <sup>-5</sup>  |
| HNF4A           | rs4812829  | A             | 0.045  | 0.019 | 0.018                  |
| CDKAL1          | rs7756992  | G             | 0.035  | 0.016 | 0.022                  |
| GRB14           | rs13389219 | C             | 0.03   | 0.014 | 0.03                   |
| MAEA            | rs6819243  | T             | 0.092  | 0.045 | 0.041                  |
| ANKRD55         | rs459193   | G             | 0.031  | 0.016 | 0.052                  |
| PEPD            | rs8182584  | T             | 0.027  | 0.014 | 0.056                  |
| GCC1            | rs17867832 | T             | -0.062 | 0.034 | 0.066                  |
| HNF1A (TCF1)    | rs12427353 | G             | 0.031  | 0.017 | 0.071                  |
| HMGA2           | rs2261181  | T             | 0.042  | 0.024 | 0.077                  |
| HNF1B (TCF2)    | rs11651052 | A             | 0.024  | 0.014 | 0.083                  |
| KCNQ1           | rs163184   | G             | 0.022  | 0.014 | 0.102                  |
| KLF14           | rs13233731 | G             | 0.022  | 0.014 | 0.113                  |
| DUSP8           | rs2334499  | T             | 0.022  | 0.014 | 0.116                  |
| SLC30A8         | rs3802177  | G             | 0.023  | 0.015 | 0.13                   |
| KCNK16          | rs3734621  | C             | 0.061  | 0.044 | 0.172                  |
| CCND2           | rs11063069 | G             | 0.023  | 0.017 | 0.174                  |
| PRC1            | rs12899811 | G             | -0.02  | 0.015 | 0.178                  |
| PPARG           | rs1801282  | C             | 0.026  | 0.021 | 0.21                   |
| DGKB            | rs17168486 | T             | -0.022 | 0.018 | 0.223                  |
| ADCY5           | rs11717195 | T             | -0.019 | 0.016 | 0.232                  |
| IRS1            | rs2943640  | C             | 0.016  | 0.014 | 0.254                  |
| MTNR1B          | rs10830963 | G             | 0.017  | 0.015 | 0.258                  |
| ANK1            | rs516946   | C             | 0.018  | 0.016 | 0.268                  |
| ADAMTS9         | rs6795735  | C             | 0.015  | 0.014 | 0.278                  |
| HHEX/IDE        | rs1111875  | C             | -0.015 | 0.014 | 0.291                  |
| ARAP1 (CENTD2)  | rs1552224  | A             | -0.019 | 0.019 | 0.31                   |
| TLE4            | rs17791513 | A             | -0.028 | 0.028 | 0.33                   |
| C2CD4A          | rs4502156  | T             | -0.013 | 0.014 | 0.361                  |
| SRR             | rs2447090  | A             | 0.013  | 0.014 | 0.37                   |
| CDC123/CAMK1D   | rs11257655 | T             | 0.015  | 0.017 | 0.372                  |
| PTPRD           | rs16927668 | T             | -0.015 | 0.017 | 0.375                  |
| VPS26A          | rs12242953 | G             | -0.024 | 0.028 | 0.395                  |
| HMG20A          | rs7177055  | A             | 0.011  | 0.015 | 0.458                  |
| IGF2BP2         | rs4402960  | T             | -0.011 | 0.015 | 0.469                  |
| TLE1            | rs2796441  | G             | -0.009 | 0.014 | 0.506                  |
| THADA           | rs10203174 | C             | 0.013  | 0.022 | 0.531                  |
| PROX1           | rs2075423  | G             | -0.009 | 0.014 | 0.532                  |



SUPPLEMENTARY DATA

|             |            |   |        |       |       |
|-------------|------------|---|--------|-------|-------|
| GIPR        | rs8108269  | G | -0.009 | 0.015 | 0.567 |
| TSPAN8/LGR5 | rs7955901  | C | 0.008  | 0.014 | 0.567 |
| WFS1        | rs4458523  | G | -0.008 | 0.014 | 0.579 |
| BCL11A      | rs243088   | T | 0.007  | 0.014 | 0.588 |
| PSMD6       | rs12497268 | G | -0.009 | 0.018 | 0.6   |
| KCNJ11      | rs5215     | C | -0.007 | 0.014 | 0.616 |
| GLIS3       | rs10758593 | A | -0.007 | 0.014 | 0.616 |
| SPRY2       | rs1359790  | G | -0.006 | 0.015 | 0.669 |
| AP3S2       | rs2007084  | G | -0.01  | 0.024 | 0.674 |
| TP53INP1    | rs7845219  | T | -0.005 | 0.014 | 0.703 |
| CDKN2A/B    | rs10811661 | T | 0.007  | 0.018 | 0.717 |
| TCF7L2      | rs7903146  | T | 0.005  | 0.015 | 0.723 |
| BCAR1       | rs7202877  | T | 0.008  | 0.023 | 0.724 |
| UBE2E2      | rs1496653  | A | -0.006 | 0.017 | 0.739 |
| ZFAND3      | rs4299828  | A | 0.006  | 0.017 | 0.74  |
| ZBED3       | rs6878122  | G | -0.004 | 0.015 | 0.791 |
| MC4R        | rs12970134 | A | 0.004  | 0.016 | 0.811 |
| ZMIZ1       | rs12571751 | A | 0.003  | 0.014 | 0.84  |
| NOTCH2      | rs10923931 | T | -0.004 | 0.022 | 0.851 |
| FTO         | rs9936385  | C | -0.002 | 0.014 | 0.893 |
| JAZF1       | rs849135   | G | 0.001  | 0.014 | 0.931 |
| ZFAND6      | rs11634397 | G | -0.001 | 0.014 | 0.967 |
| ST64GAL1    | rs17301514 | A | -0.001 | 0.022 | 0.968 |
| KLHDC5      | rs10842994 | C | -0.001 | 0.017 | 0.972 |
| RBMS1       | rs7569522  | A | 0      | 0.014 | 0.993 |
| GCK         | rs10278336 | A | 0      | 0.014 | 0.996 |

SUPPLEMENTARY DATA

**Supplementary Table 4.** Area under the receiver operator curve for T2D gene scores for each study.

| Study                               | N Cases/controls | Externally weighted | Unweighted          |
|-------------------------------------|------------------|---------------------|---------------------|
| BRHS                                | 150/2167         | 0.592 (0.545-0.638) | 0.593 (0.546-0.640) |
| BWHHS                               | 103/1751         | 0.588 (0.529-0.648) | 0.575 (0.519-0.632) |
| EAS                                 | 16/687           | 0.672 (0.559-0.785) | 0.580 (0.447-0.713) |
| MRC NSHD                            | 118/2292         | 0.618 (0.568-0.669) | 0.609 (0.560-0.657) |
| WHII                                | 219/2826         | 0.556 (0.516-0.597) | 0.555 (0.515-0.594) |
| ELSA                                | 74/1611          | 0.639 (0.571-0.706) | 0.612 (0.546-0.678) |
| CAPS                                | 124/1156         | 0.646 (0.595-0.696) | 0.605 (0.555-0.654) |
| Combined studies<br>(fixed effect)  | 804/12490        | 0.602 (0.582-0.622) | 0.587 (0.567-0.607) |
| Combined studies<br>(random effect) | 804/12490        | 0.607 (0.578-0.636) | 0.587 (0.567-0.607) |

Test for heterogeneity between studies in ROC area (p=0.08 externally weighted and p=0.59 unweighted).

**Supplementary Table 5.** . Detection rates at 5% and 10% false positive rates (FPR) for the individual studies and the combined study.

|                                        | 5% FPR<br>FORS            | 10% FPR<br>FORS           | 5% FPR<br>FORS + Gene<br>score | 10% FPR<br>FORS + Gene<br>score |
|----------------------------------------|---------------------------|---------------------------|--------------------------------|---------------------------------|
| BRHS                                   | 15.33%                    | 32.00%                    | 24.67%                         | 38.00%                          |
| BWHHS                                  | 18.45%                    | 29.13%                    | 22.33%                         | 37.86%                          |
| EAS                                    | 6.25%                     | 12.50%                    | 12.50%                         | 12.50%                          |
| MRC<br>NSHD                            | 14.41%                    | 20.34%                    | 20.34%                         | 38.98%                          |
| WHII                                   | 25.11%                    | 34.25%                    | 25.11%                         | 34.70%                          |
| ELSA                                   | 12.16%                    | 32.43%                    | 16.22%                         | 39.19%                          |
| CAPS                                   | 29.84%                    | 41.13%                    | 29.84%                         | 43.55%                          |
| All- fixed<br>effects                  | 18.56%                    | 30.67%                    | 23.14%                         | 37.28%                          |
| (95% CI)                               | (15.90 - 21.22)           | (27.51 -33.82)            | (20.23-26.05)                  | (33.95 - 40.61)                 |
| All -<br>random<br>effects<br>(95% CI) | 18.14%<br>(12.98 - 23.29) | 30.10%<br>(24.26 - 35.95) | 22.97%<br>(19.57 - 26.36)      | 37.11%<br>(32.65 - 41.57)       |

SUPPLEMENTARY DATA

**Supplementary Table 6.** Calibration of 10 year risk categories for T2D for Framingham Offspring Score with and without the externally weighted gene score.

| Score (overall)                            | Predicted risk |        |          |       |
|--------------------------------------------|----------------|--------|----------|-------|
|                                            | <5%            | 5-9.9% | 10-14.9% | ≥15%  |
| FORS                                       | 3.1%           | 6.1%   | 12.2%    | 19.3% |
| FORS+<br>Externally weighted<br>gene score | 3.1%           | 5.6%   | 11.9%    | 19.8% |

Observed and predicted risks adjusted to 10 years follow-up

**Supplementary Table 7.** Effect of adding genetic information to model fit and calibration (overall model).

| Model   | L-R test                 | BIC     | Hosmer-Lemeshow |
|---------|--------------------------|---------|-----------------|
| FORS    | -                        | 5465.88 | P=0.65          |
| FORS+EW | P=1.34x10 <sup>-16</sup> | 5406.15 | P=0.10          |

**Supplementary Table 8.** Area under the ROC curve for Framingham variables and Framingham + externally weighted gene score by BMI tertiles.

|         | Combined studies          | BMI<24.5                           | BMI 24.5-27.4                    | BMI≥27.5                         | P value |
|---------|---------------------------|------------------------------------|----------------------------------|----------------------------------|---------|
| FORS    | ROC (95% CI)              | 0.697<br>(0.645-0.748)             | 0.753<br>(0.724-0.782)           | 0.696<br>(0.672-0.719)           |         |
| FORS+EW | ROC (95% CI)              | 0.739<br>(0.690-0.787)             | 0.752<br>(0.722-0.783)           | 0.713 (0.689-0.737)              |         |
|         | Difference (FORS+EW)-FORS | 0.037<br>(0.018-0.056)<br>P=0.0001 | 0.017<br>(0.004-0.031)<br>P=0.01 | 0.013<br>(0.002-0.023)<br>P=0.02 | P=0.02  |

SUPPLEMENTARY DATA

**Supplementary Table 9.** Net Reclassification index by tertiles of age  $\leq 53$  years, 54-59 year and  $\geq 60$ , based on addition of gene score to FORS, calculated using risk cut offs of 5%, 10%, 15% for ten year risk.

a)

| Age $\leq$ 53                                             | No. of people                                                              |        |         |           | Reclassified   |                |                            |
|-----------------------------------------------------------|----------------------------------------------------------------------------|--------|---------|-----------|----------------|----------------|----------------------------|
|                                                           | Plus the externally weighted gene score –<br><b>T2D free</b> (n=7520.25)   |        |         |           |                |                |                            |
| Predicted risk FORS                                       | <5                                                                         | 5-9.9  | 10-14.9 | $\geq$ 15 | Increased risk | Decreased risk | Net correctly reclassified |
| <5                                                        | 4447.32                                                                    | 280.99 | 14.85   | 4         | 758.71         | 672.18         | -1.2% (02.1 to -0.2)       |
| 5-9.9                                                     | 330.24                                                                     | 723.48 | 232.03  | 64.4      |                |                |                            |
| 10-14.9                                                   | 13.79                                                                      | 196.48 | 208.35  | 200.73    |                |                |                            |
| $\geq$ 15                                                 | 0                                                                          | 23.84  | 118.07  | 626.9     |                |                |                            |
|                                                           | Plus the externally weighted gene score-<br><b>Incident T2D</b> (n=478.36) |        |         |           |                |                |                            |
|                                                           | <5                                                                         | 5-9.9  | 10-14.9 | $\geq$ 15 |                |                |                            |
| <5                                                        | 142.21                                                                     | 16     | 1       | 0         | 80.99          | 31.6           | 10.3% (6.0 to 14.7)        |
| 5-9.9                                                     | 12                                                                         | 36.67  | 23.75   | 12.82     |                |                |                            |
| 10-14.9                                                   | 0                                                                          | 13.60  | 29.36   | 27.42     |                |                |                            |
| $\geq$ 15                                                 | 0                                                                          | 2      | 4       | 157.53    |                |                |                            |
| NRI (95% CI)* =9.2% (4.7 to 13.6) p=5.49x10 <sup>-5</sup> |                                                                            |        |         |           |                |                |                            |

SUPPLEMENTARY DATA

b)

| Age 54-59                                | No. of people                                                               |        |         |        | Reclassified      |                   |                               |
|------------------------------------------|-----------------------------------------------------------------------------|--------|---------|--------|-------------------|-------------------|-------------------------------|
|                                          | Plus the externally weighted gene score –<br><b>T2D free</b> (n=2382.50)    |        |         |        |                   |                   |                               |
| Predicted risk<br>FORS                   | <5                                                                          | 5-9.9  | 10-14.9 | >=15   | Increased<br>risk | Decreased<br>risk | Net correctly<br>reclassified |
| <5                                       | 1615.68                                                                     | 115.12 | 9.2     | 0      | 226.63            | 142.07            | -3.5%<br>(-5.1 to -2.0)       |
| 5-9.9                                    | 81.91                                                                       | 187.44 | 47.04   | 14.81  |                   |                   |                               |
| 10-14.9                                  | 0                                                                           | 33.37  | 48.39   | 40.46  |                   |                   |                               |
| >=15                                     | 0                                                                           | 3.75   | 23.04   | 162.29 |                   |                   |                               |
|                                          | Plus the externally weighted gene score –<br><b>Incident T2D</b> (n=182.35) |        |         |        |                   |                   |                               |
|                                          | <5                                                                          | 5-9.9  | 10-14.9 | >=15   |                   |                   |                               |
| <5                                       | 58.36                                                                       | 11     | 0       | 0      | 27                | 17.66             | 5.1%<br>(-2.1 to 12.3)        |
| 5-9.9                                    | 9.52                                                                        | 18.25  | 2       | 2      |                   |                   |                               |
| 10-14.9                                  | 0                                                                           | 6      | 7       | 12     |                   |                   |                               |
| >=15                                     | 0                                                                           | 0      | 2.14    | 54.08  |                   |                   |                               |
| NRI (95% CI)* =1.6% (-5.8 to 8.9) p=0.68 |                                                                             |        |         |        |                   |                   |                               |

SUPPLEMENTARY DATA

c)

|                                           |                                                                             |         |         |        |                |                |                            |
|-------------------------------------------|-----------------------------------------------------------------------------|---------|---------|--------|----------------|----------------|----------------------------|
| Age>=60                                   | No. of people                                                               |         |         |        |                |                |                            |
|                                           | Plus the externally weighted gene score –<br><b>T2D free</b> (n=8813.05)    |         |         |        | Reclassified   |                |                            |
| Predicted risk FORS                       | <5                                                                          | 5-9.9   | 10-14.9 | >=15   | Increased risk | Decreased risk | Net correctly reclassified |
| <5                                        | 4343.63                                                                     | 185.89  | 12.22   | 0      | 796.89         | 1324.37        | 6.0%                       |
| 5-9.9                                     | 652.37                                                                      | 1056.37 | 286.88  | 46.62  |                |                | (5.0 to 7.0)               |
| 10-14.9                                   | 21.38                                                                       | 417.38  | 373.61  | 265.28 |                |                |                            |
| >=15                                      | 6.55                                                                        | 51.30   | 175.39  | 918.18 |                |                |                            |
|                                           | Plus the externally weighted gene score –<br><b>Incident T2D</b> (n=461.14) |         |         |        |                |                |                            |
|                                           | <5                                                                          | 5-9.9   | 10-14.9 | >=15   |                |                |                            |
| <5                                        | 78.44                                                                       | 7.13    | 0       | 0      | 77.97          | 67.22          | 2.3%                       |
| 5-9.9                                     | 15.27                                                                       | 26.28   | 30.22   | 1      |                |                | (-2.8 to                   |
| 10-14.9                                   | 0                                                                           | 26.33   | 34.88   | 39.62  |                |                | 7.5)                       |
| >=15                                      | 0                                                                           | 9.73    | 15.89   | 176.35 |                |                |                            |
| NRI (95% CI)* =8.3% (3.1 to 13.5) p=0.002 |                                                                             |         |         |        |                |                |                            |

**Supplementary Table 10.** Area under the ROC curve for Framingham variables and Framingham + externally weighted gene score by gender.

|         | Combined studies              | Men                               | Women                            | P value |
|---------|-------------------------------|-----------------------------------|----------------------------------|---------|
| FORS    | ROC (95% CI)                  |                                   |                                  |         |
| FORS+EW | ROC (95% CI)                  |                                   |                                  |         |
|         | Difference (FORS+EW)-<br>FORS | 0.012<br>(0.004-0.019)<br>P=0.003 | 0.016<br>(0.003-0.029)<br>P=0.02 | P=0.59  |

SUPPLEMENTARY DATA

**Supplementary Table 11.** Net -reclassification index based on addition of gene score to FORS, calculated using risk cut offs of 5%, 10%, 15% for ten year risk.

a) Male

| Male                                                     | No. of people                                                     |        |         |        | Reclassified   |                |                            |
|----------------------------------------------------------|-------------------------------------------------------------------|--------|---------|--------|----------------|----------------|----------------------------|
|                                                          | Plus externally weighted gene score- No DIABETES (n=10530.36)     |        |         |        |                |                |                            |
| Predicted risk FORS                                      | <5                                                                | 5-9.9  | 10-14.9 | >=15   | Increased risk | Decreased risk | Net correctly reclassified |
| <5                                                       | 6593.68                                                           | 396.59 | 24.06   | 0      | 982.2          | 906.47         | -0.7%<br>(-1.5 to 0.1)     |
| 5-9.9                                                    | 467.02                                                            | 902.8  | 258.31  | 64.75  |                |                |                            |
| 10-14.9                                                  | 8.79                                                              | 263.6  | 309.52  | 238.49 |                |                |                            |
| >=15                                                     | 3.13                                                              | 35.96  | 127.97  | 835.69 |                |                |                            |
|                                                          | Plus externally weighted gene score- INCIDENT DIABETES (n=705.96) |        |         |        |                |                |                            |
| Predicted risk FORS                                      | <5                                                                | 5-9.9  | 10-14.9 | >=15   |                |                |                            |
| <5                                                       | 223.2                                                             | 27     | 1       | 0      | 122.61         | 52.39          | 9.9%<br>(6.3 to 13.6)      |
| 5-9.9                                                    | 22.65                                                             | 55.05  | 37.87   | 12.82  |                |                |                            |
| 10-14.9                                                  | 0                                                                 | 18.6   | 32.48   | 43.92  |                |                |                            |
| >=15                                                     | 0                                                                 | 4      | 7.14    | 220.23 |                |                |                            |
| NRI (95% CI)= 9.2% (5.5 to 13.0) p=1.52x10 <sup>-6</sup> |                                                                   |        |         |        |                |                |                            |

b) Female

| Female                                   | No. of people                                                     |         |         |        | Reclassified   |                |                            |
|------------------------------------------|-------------------------------------------------------------------|---------|---------|--------|----------------|----------------|----------------------------|
|                                          | Plus externally weighted gene score- No DIABETES (n=8185.42)      |         |         |        |                |                |                            |
| Predicted risk FORS                      | <5                                                                | 5-9.9   | 10-14.9 | >=15   | Increased risk | Decreased risk | Net correctly reclassified |
| <5                                       | 3812.94                                                           | 185.41  | 12.22   | 0      | 800.02         | 1232.18        | 5.3%<br>(4.3 to 6.4)       |
| 5-9.9                                    | 597.5                                                             | 1064.46 | 284.25  | 53.49  |                |                |                            |
| 10-14.9                                  | 26.38                                                             | 383.63  | 372.86  | 264.65 |                |                |                            |
| >=15                                     | 3.42                                                              | 42.93   | 178.32  | 902.96 |                |                |                            |
|                                          | Plus externally weighted gene score- INCIDENT DIABETES (n=415.89) |         |         |        |                |                |                            |
| Predicted risk FORS                      | <5                                                                | 5-9.9   | 10-14.9 | >=15   |                |                |                            |
| <5                                       | 55.81                                                             | 7.13    | 0       | 0      | 63.35          | 64.09          | -0.2%<br>(-5.5 to 5.1)     |
| 5-9.9                                    | 14.14                                                             | 26.15   | 18.1    | 3      |                |                |                            |
| 10-14.9                                  | 0                                                                 | 27.33   | 38.76   | 35.12  |                |                |                            |
| >=15                                     | 0                                                                 | 7.73    | 14.89   | 167.73 |                |                |                            |
| NRI (95% CI)= 5.1% (-0.3 to 10.5) p=0.07 |                                                                   |         |         |        |                |                |                            |

SUPPLEMENTARY DATA

**Supplementary Table 12.** Analysis of the original 20 SNPS reported in (11)

a) NRI (combined studies)

| ALL                                      | No. of people                                     |         |         |         | Reclassified   |                |                            |
|------------------------------------------|---------------------------------------------------|---------|---------|---------|----------------|----------------|----------------------------|
|                                          | Plus EW gene score- No DIABETES (n=15989.79)      |         |         |         |                |                |                            |
| Predicted risk FORS                      | <5                                                | 5-9.9   | 10-14.9 | >=15    | Increased risk | Decreased risk | Net correctly reclassified |
| <5                                       | 8702.28                                           | 551.46  | 49.64   | 5.6     | 1737.28        | 2383.08        | 4.0%                       |
| 5-9.9                                    | 1178.83                                           | 1283.48 | 505.69  | 206.85  |                |                |                            |
| 10-14.9                                  | 101.83                                            | 601.48  | 432.98  | 418.04  |                |                |                            |
| >=15                                     | 1                                                 | 147.24  | 352.7   | 1450.69 |                |                |                            |
|                                          | Plus EW gene score- INCIDENT DIABETES (n=1069.46) |         |         |         |                |                |                            |
|                                          | <5                                                | 5-9.9   | 10-14.9 | >=15    |                |                |                            |
| <5                                       | 240.05                                            | 42.57   | 5.42    | 0       | 190.52         | 170.44         | 1.9%                       |
| 5-9.9                                    | 48.62                                             | 68.94   | 34.06   | 28.72   |                |                |                            |
| 10-14.9                                  | 5.13                                              | 55.22   | 51.74   | 79.75   |                |                |                            |
| >=15                                     | 3.26                                              | 21.72   | 36.49   | 347.77  |                |                |                            |
| NRI (95% CI)* =5.9% (2.3 to 9.5) p=0.001 |                                                   |         |         |         |                |                |                            |
| NRI (95% CI) † 4.3% (0.8 to 7.8) p=0.02  |                                                   |         |         |         |                |                |                            |
| NRI (95% CI) ‡ 5.0% (0.2 to 9.9) p=0.04  |                                                   |         |         |         |                |                |                            |

\*no adjustment for study

† results from fixed effects meta-analysis of individual study results. I-squared=40.7%, p value for heterogeneity p=0.12.

‡ results from random effects meta-analysis of individual study results.

b) A<sub>ROC</sub>s of the combined seven studies

|          |                                                  | Combined                        |
|----------|--------------------------------------------------|---------------------------------|
| FORS     | A <sub>ROC</sub><br>(95% CI)                     | 0.75<br>(0.74-0.80)             |
| FORS+ EW | A <sub>ROC</sub><br>(95% CI)<br>p value vs. FORS | 0.76<br>(0.74 0-0.78)<br>p=0.23 |

Difference (FORS+EW) – FORS: 0.005 (-0.003 to 0.013) p=0.23



SUPPLEMENTARY DATA

**Supplementary Figure 1.** Receiver operating characteristic (ROC) curves for the seven UCLEB studies in the analysis.

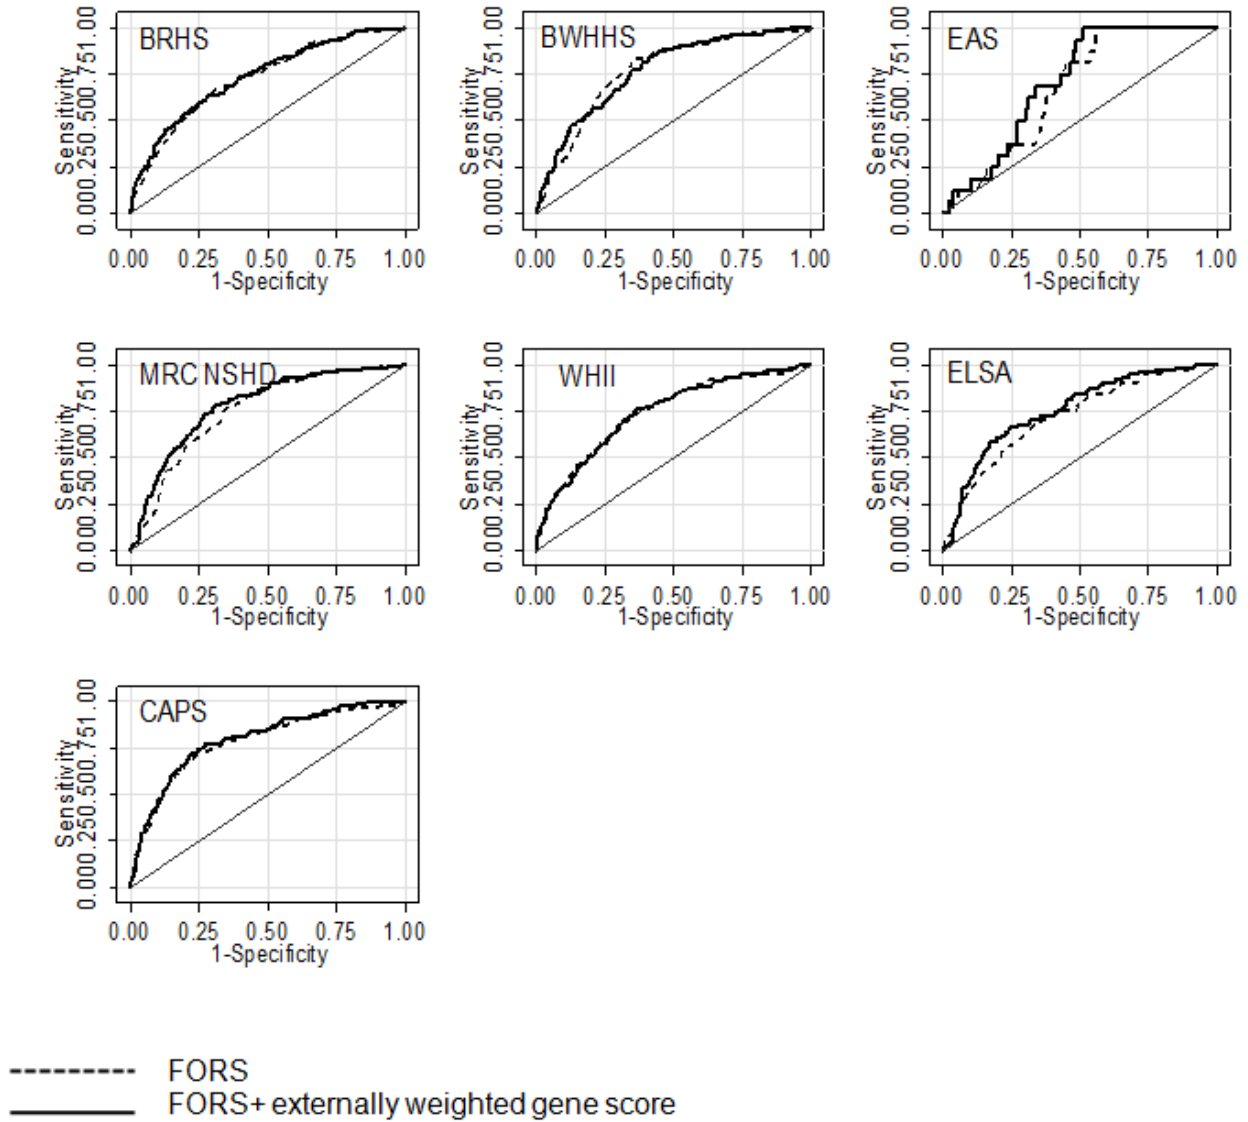

SUPPLEMENTARY DATA

**Supplementary Figure 2.** Forest plot for the detection rate (5% FPR) for each of the seven studies for the Framingham phenotypic score alone and (b) Framingham score plus the weighted gene score.

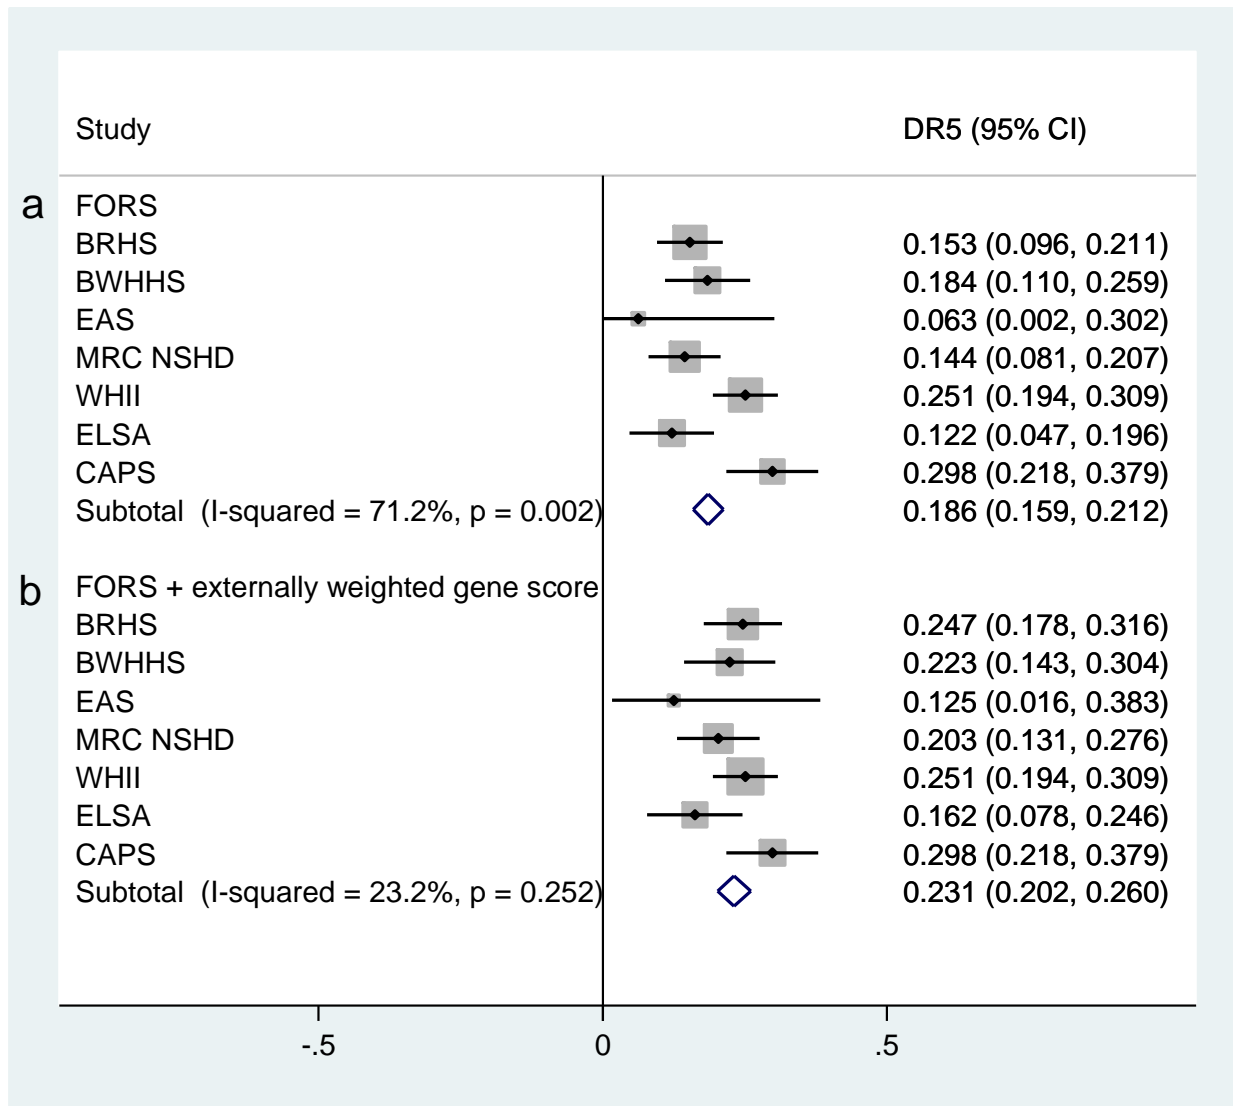

SUPPLEMENTARY DATA

**Supplementary Figure 3.** Distribution of unweighted gene score and odds ratios for association with T2D.

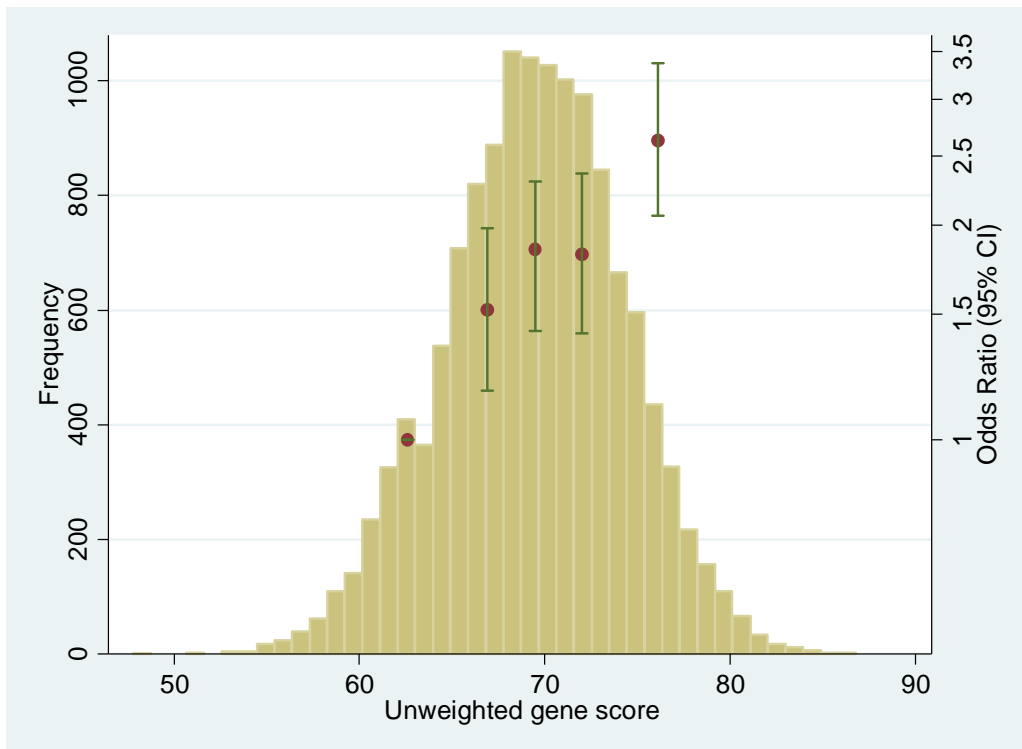

The OR for T2D among individuals in the top vs bottom quintile of the gene score distribution was 2.63 (2.06-3.37)  $p=1.16 \times 10^{-14}$  for the un-weighted gene score. The  $A_{ROC}$  for the un-weighted gene score was 0.586 (0.566-0.606).

SUPPLEMENTARY DATA

**Supplementary Figure 4.** Hosmer-Lemeshow calibration plot showing observed against predicted values by decile of predicted risk.

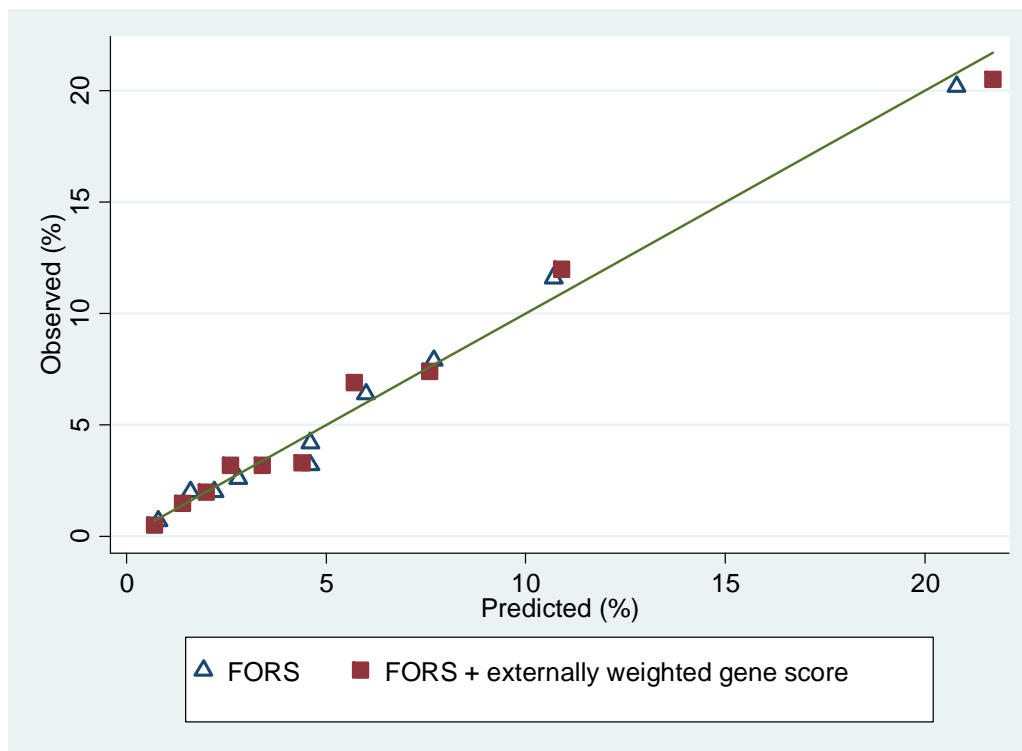

Hosmer-Lemeshow  $p=0.65$  FORS and  $p=0.10$  FORS + externally weighted gene score.

SUPPLEMENTARY DATA

**Supplementary Figure 5.** The Net Reclassification Index by Study.

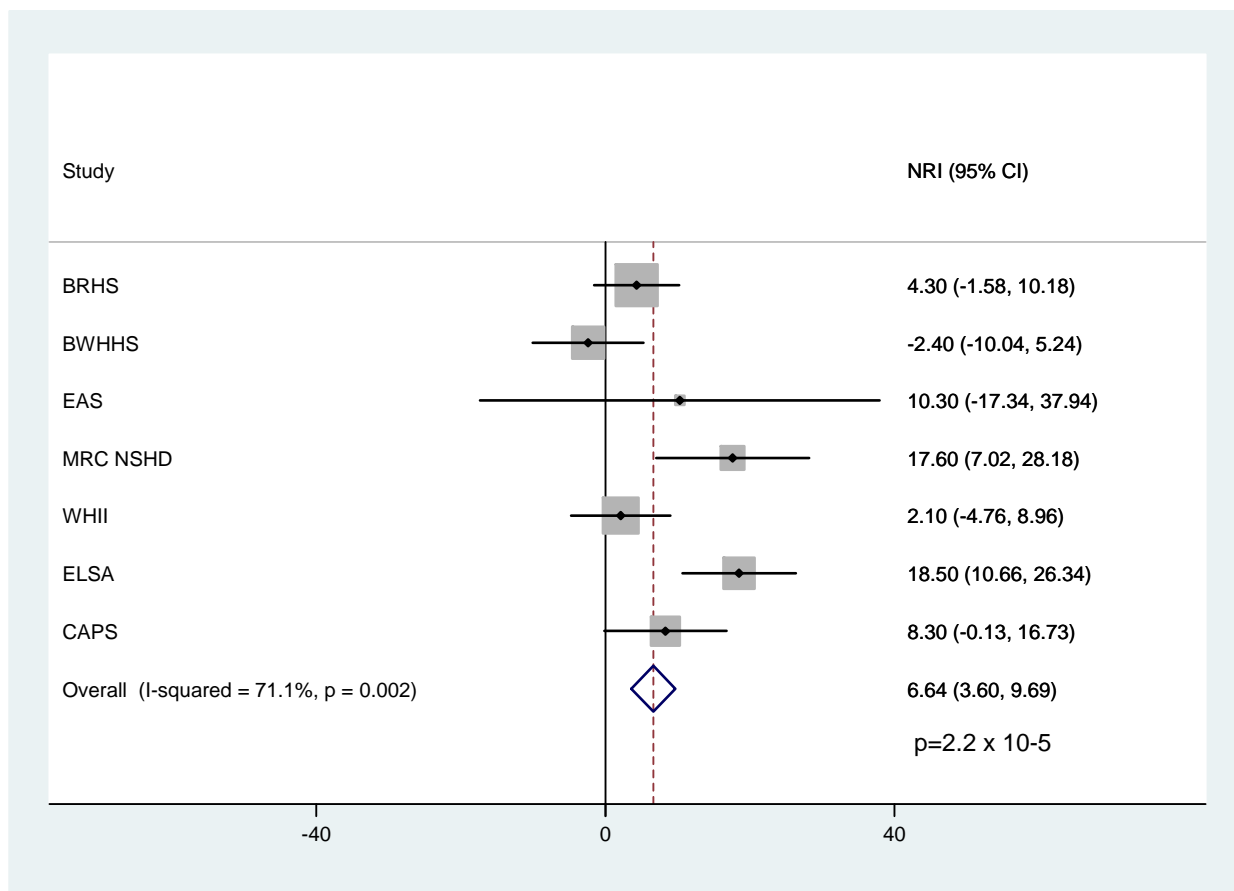

SUPPLEMENTARY DATA

**Supplementary Figure 6.** The continuous Net Reclassification Index for the seven studies individually and combined.

The continuous NRI(12) , which is independent of cut points, also indicated an improvement in prediction after adding the gene score, continuous NRI=29.7% (95%CI 23.7-35.7)  $p=2.04 \times 10^{-23}$  fixed effects and 34.7% (20.9 – 48.6)  $p=8.65 \times 10^{-07}$  random effects model.

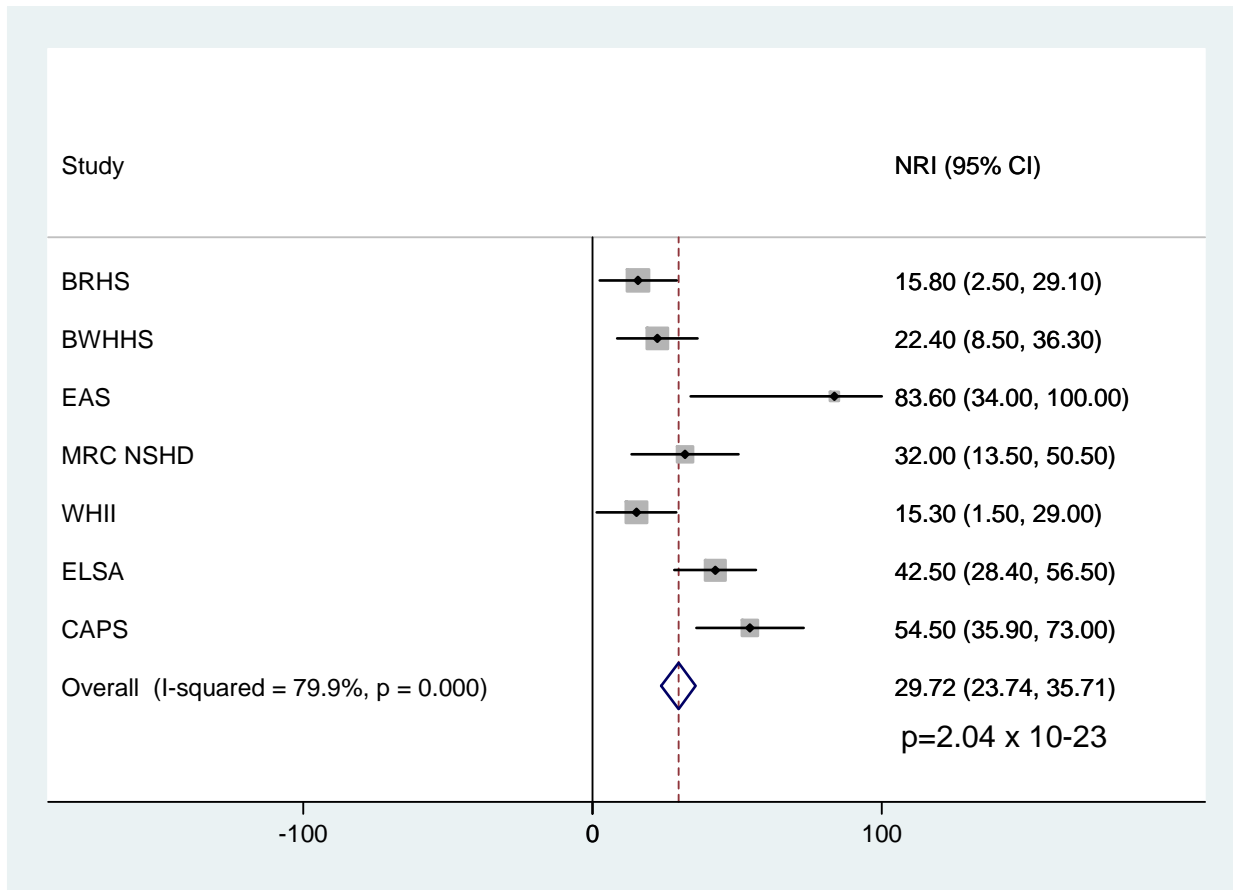

SUPPLEMENTARY DATA

**Supplementary Figure 7.** The Integrated Discrimination improvement for the seven studies individually and combined.

The Integrated Discrimination Improvement (IDI), which is independent of cut points, also indicated a marginal improvement in prediction after adding the gene score, of 0.013 (0.009 to 0.017)  $p=6.15 \times 10^{-11}$ .

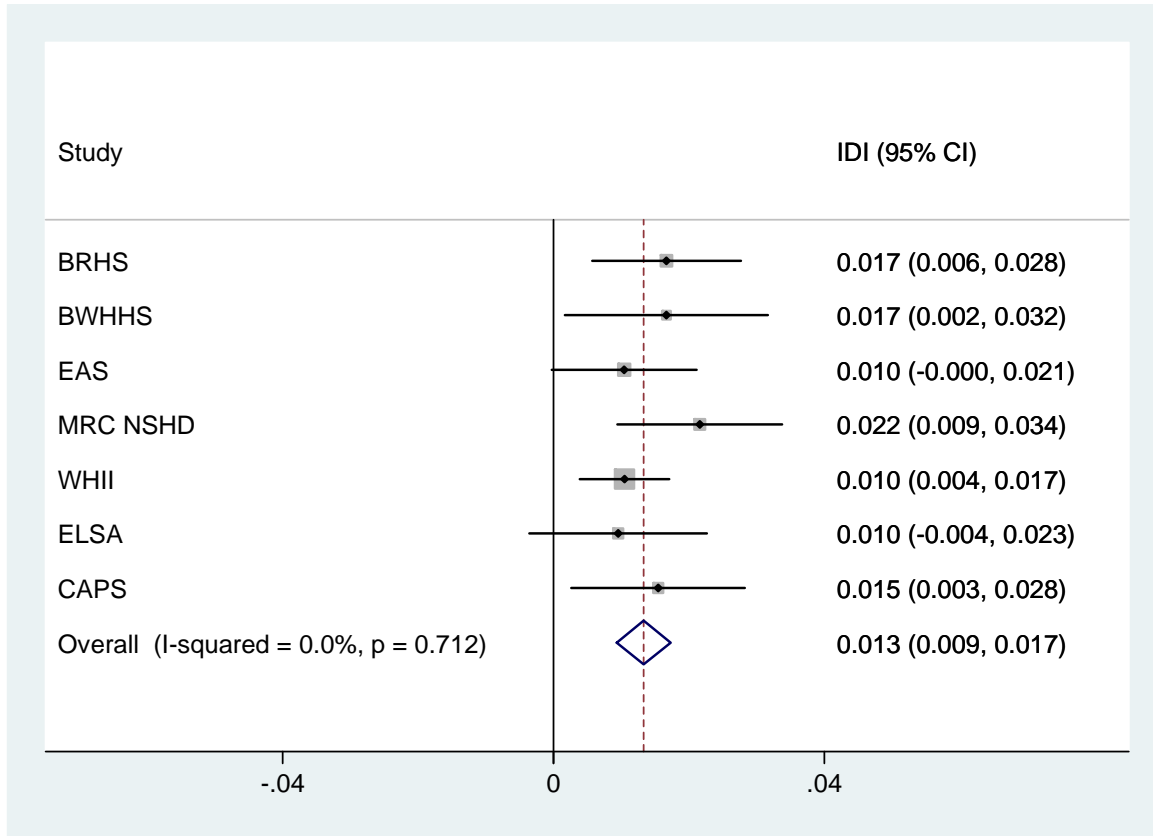

SUPPLEMENTARY DATA

**Supplementary Figure 8.** Calibration plots for FORS+ externally weighted gene score by tertile of BMI.

a)

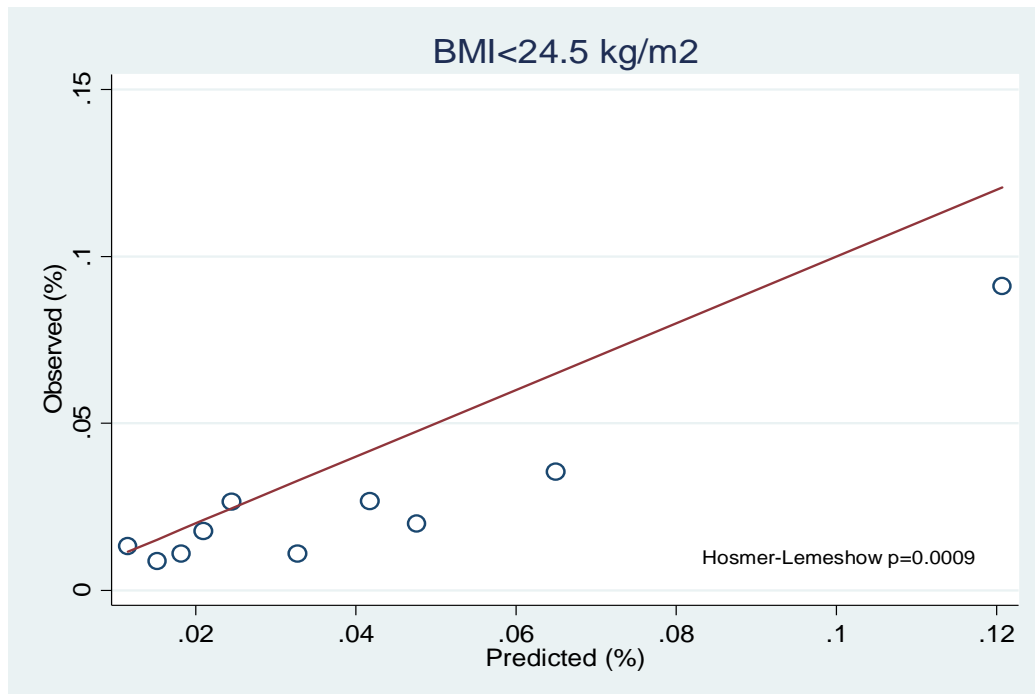



SUPPLEMENTARY DATA

b)

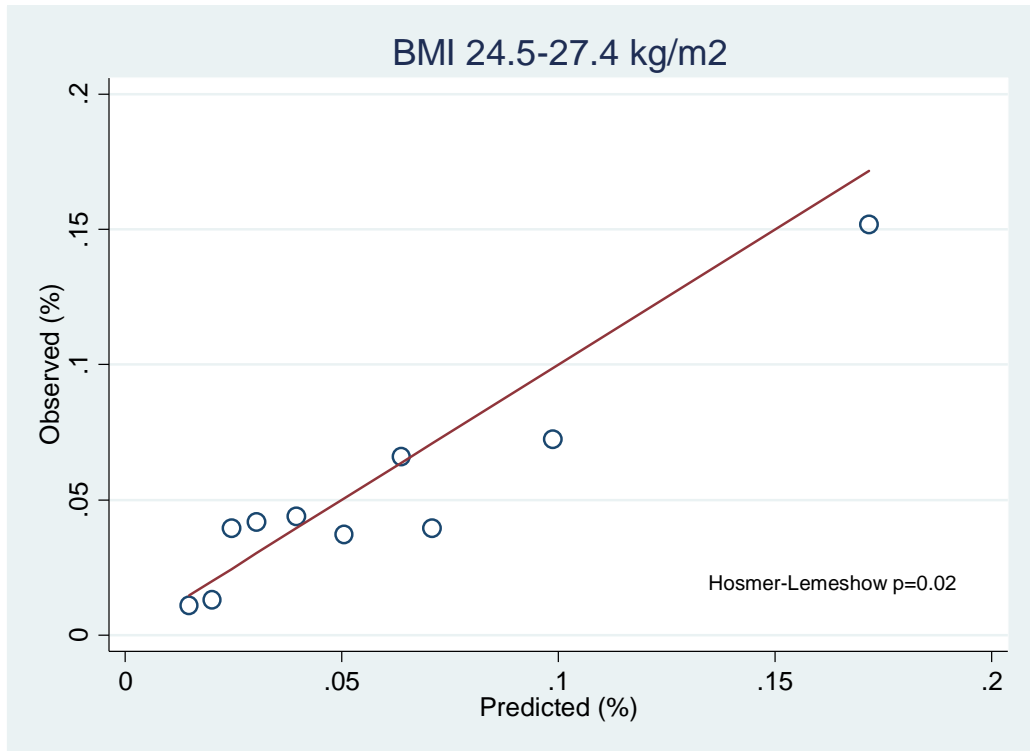

c)

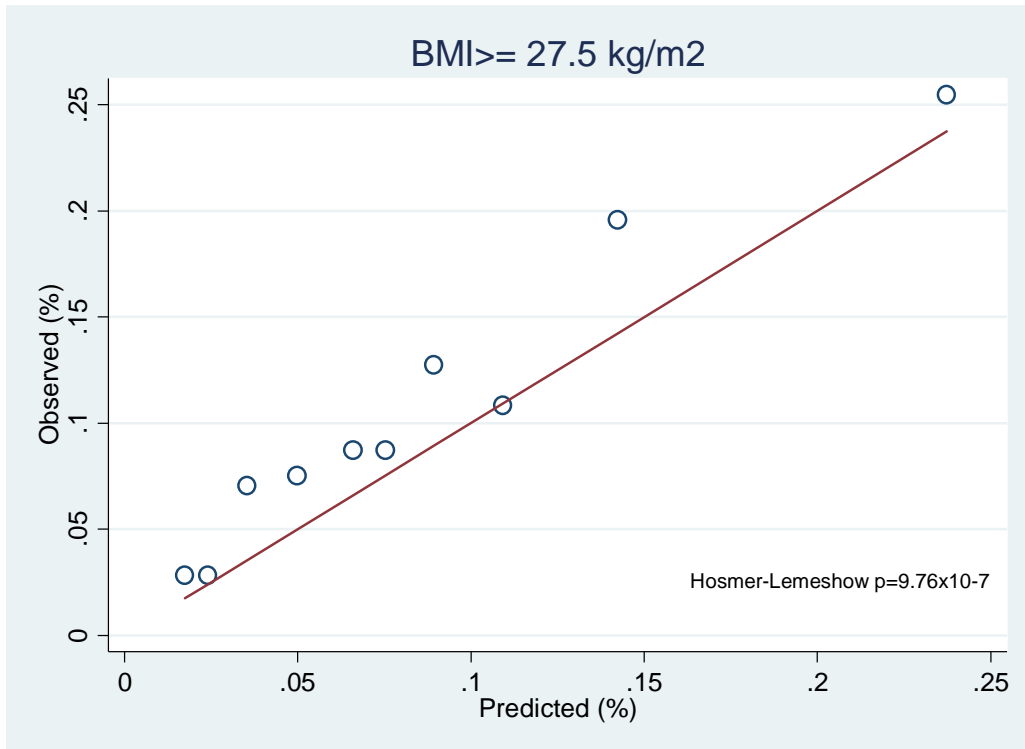

SUPPLEMENTARY DATA

**Supplementary Figure 9.** Calibration plots for FORS plus externally weighted gene score by tertiles of age.

a)

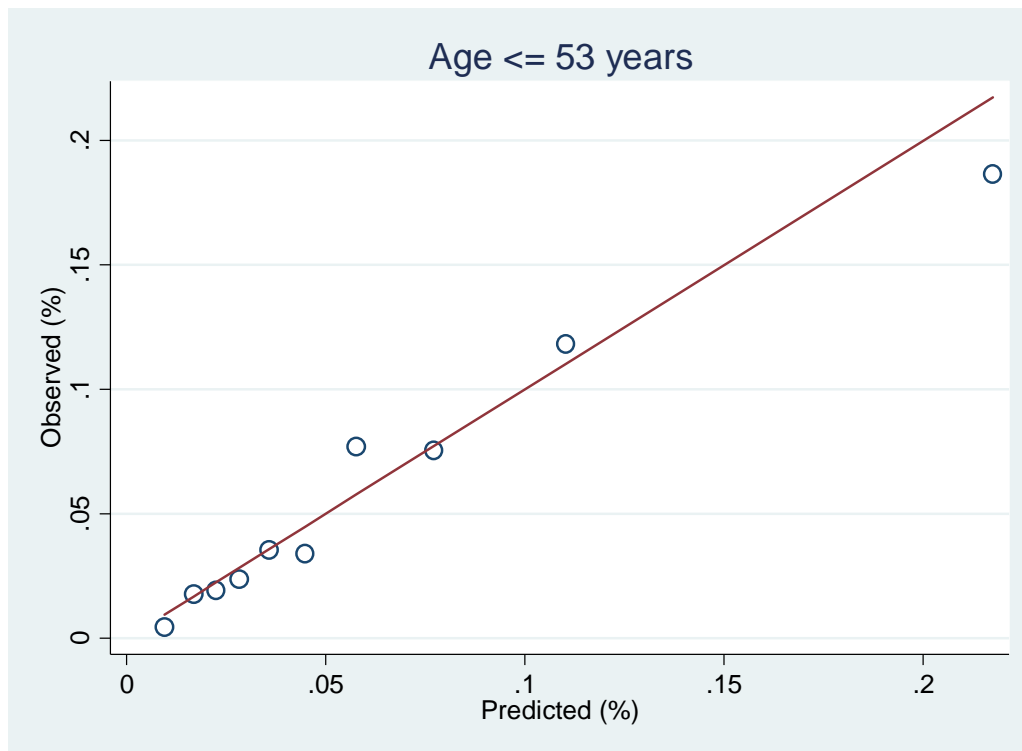

SUPPLEMENTARY DATA

b)

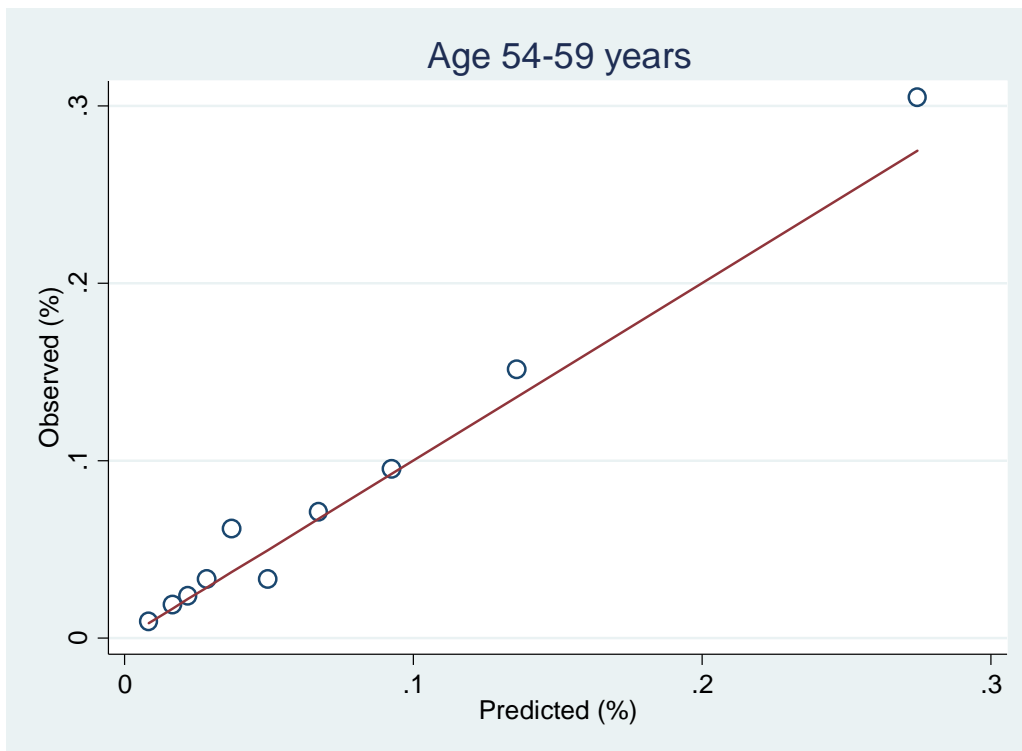

c)

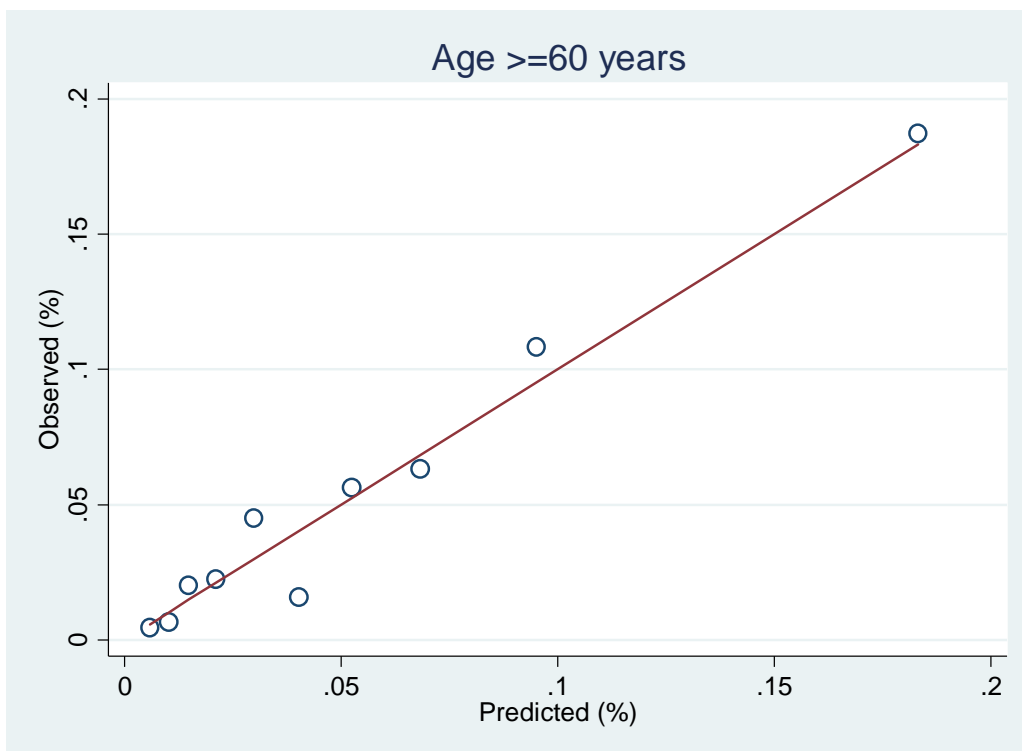

SUPPLEMENTARY DATA

**Supplementary Figure 10 .** Calibration plots for FORS+ externally weighted gene score by gender.

a) male

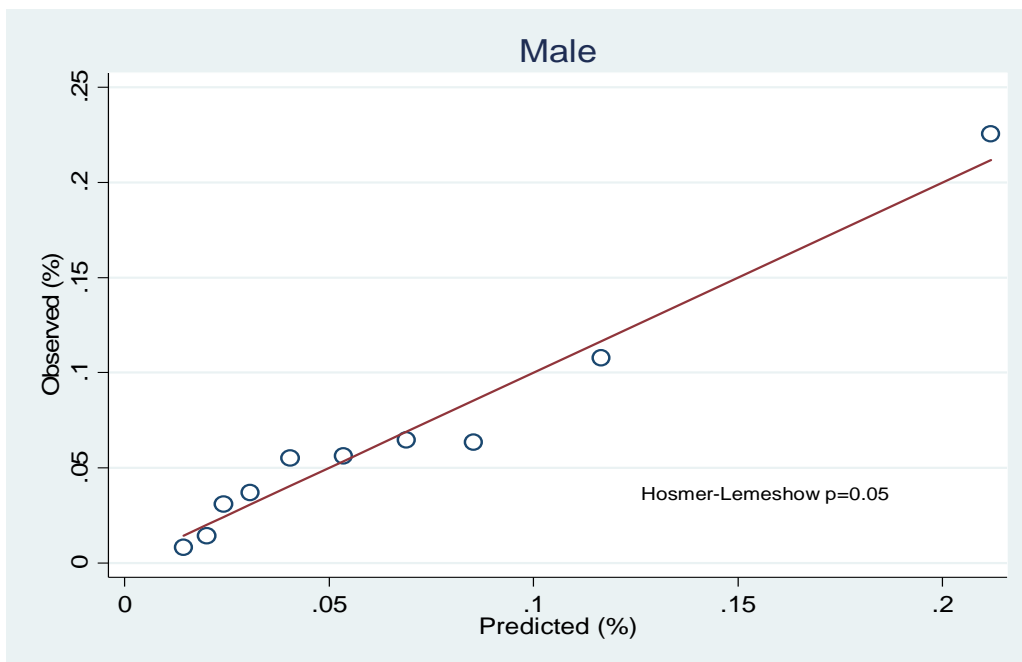

b) female

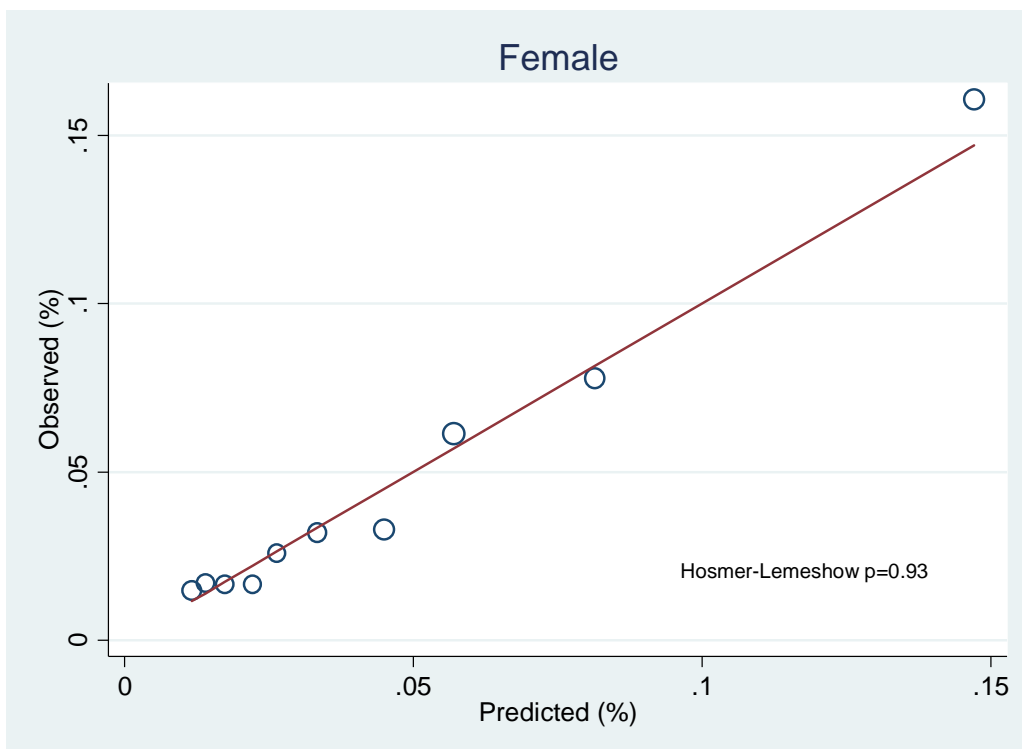

## SUPPLEMENTARY DATA

### References

1. Shaper AG, Pocock SJ, Walker M, Cohen NM, Wale CJ, Thomson AG. British Regional Heart Study: cardiovascular risk factors in middle-aged men in 24 towns. *Br Med J* 1981;283:179-186,
2. Lawlor DA, Bedford C, Taylor M, Ebrahim S. Geographical variation in cardiovascular disease, risk factors, and their control in older women: British Women's Heart and Health Study. *J Epidemiol Community Health* 2003;57:134-140,
3. Wadsworth M, Kuh D, Richards M, Hardy R. Cohort Profile: The 1946 National Birth Cohort (MRC National Survey of Health and Development). *Int J Epidemiol* 2006;35:49-54,
4. Kuh D, Pierce M, Adams J, Deanfield J, Ekelund U, et al. Cohort profile: updating the cohort profile for the MRC National Survey of Health and Development: a new clinic-based data collection for ageing research. *Int J Epidemiol* 2011;40:e1-e9,
5. Rousseau K, Byrne C, Griesinger G, Let al. Allelic association and recombination hotspots in the mucin gene (MUC) complex on chromosome 11p15.5. *Ann Hum Genet* 2007;71:561-569,
6. Fowkes FG, Housley E, Cawood EH, Macintyre CC, et al. Edinburgh Artery Study: prevalence of asymptomatic and symptomatic peripheral arterial disease in the general population. *Int J Epidemiol* 1991;20:384-392,
7. Marmot MG, Smith GD, Stansfeld S, Patel C, et al. Health inequalities among British civil servants: the Whitehall II study. *Lancet* 1991;337:1387-1393,
8. Marmot MG, Banks J, Blundell R, Lessof C, and Nazroo J. Health, Wealth and Lifestyles of the Older Population in England: The 2002 English Longitudinal Study of Ageing. 2003;Institute for Fiscal Studies.
9. Bainton D, Miller NE, Bolton CH, Yarnell JW, et al. Plasma triglyceride and high density lipoprotein cholesterol as predictors of ischaemic heart disease in British men. The Caerphilly and Speedwell Collaborative Heart Disease Studies. *Br Heart J* 1992;68:60-66,
10. Morris AP, Voight BF, Teslovich TM, Ferreira T, Segre AV, et al. Large-scale association analysis provides insights into the genetic architecture and pathophysiology of type 2 diabetes. *Nat Genet* 2012;44:981-990,
11. Talmud PJ, Hingorani AD, Cooper JA, Marmot MG, et al. Utility of genetic and non-genetic risk factors in prediction of type 2 diabetes: Whitehall II prospective cohort study. *B M J* 2010;340:b4838,
12. Pencina MJ, D'Agostino RB, Sr., Demler OV. Novel metrics for evaluating improvement in discrimination: net reclassification and integrated discrimination improvement for normal variables and nested models. *Stat Med* 2012;31:101-113,
